# 1 Gaze-Related Activity in Primate Frontal Cortex

## 2 Predicts and Mitigates Spatial Uncertainty

3 Vishal Bharmauria<sup>1,#</sup>, Adrian Schütz<sup>2,#</sup>, Parisa Abedi Khoozani<sup>1</sup>, Xiaogang Yan<sup>1</sup>,  
4 Hongying Wang<sup>1</sup>, Frank Bremmer<sup>2</sup>, J. Douglas Crawford<sup>1,3\*</sup>

- 5 1. Centre for Vision Research and Vision: Science to Applications (VISTA)  
6 Program, 4700 Keele Street, York University, Toronto, Ontario, Canada, M3J 1P3
- 7 2. Department of Neurophysics, Philipps-Universität Marburg, Karl-von-Frisch-  
8 Straße 8a, Marburg, Germany, and Center for Mind, Brain and Behavior –  
9 CMBB, Philipps-Universität Marburg and Justus-Liebig-Universität Giessen,  
10 Germany
- 11 3. Departments of Psychology, Biology and Kinesiology & Health Sciences, York  
12 University, 4700 Keele Street, Toronto, Ontario, Canada, M3J 1P3

13  
14 **# These authors contributed equally**

15 **\* Corresponding author:**

16 Dr. John Douglas Crawford  
17 Departments of Psychology, Biology and Kinesiology & Health Sciences  
18 York University, Toronto, Canada  
19 Centre for Vision Research, Room 0009A LAS  
20 4700 Keele Street, Toronto, Ontario, M3J 1P3  
21 Email: [jdc@yorku.ca](mailto:jdc@yorku.ca)  
22 Phone: 416-736-2100 x 88621; Fax: 416-736-5857

23  
24 **Number of Pages** : 47

25 **Number of Figures** : 7 (main); 2 (supplementary)

26 **Number of Words (Abstract)** : 148

27 **Number of Words (Introduction)** : 494

28 **Number of Words (Discussion)** : 1845

29  
30 **Running title:** Predictive landmark integration in frontal cortex

31 **Conflict of Interest:** The authors declare no conflicts of interest

32 **Acknowledgement:** This project was supported by a Canadian Institutes for Health  
33 Research (CIHR) Grant and the Vision: Science to Applications (VISTA) Program, which  
34 is supported in part by the Canada first Research Excellence Fund and by Deutsche  
35 Forschungsgemeinschaft (IRTG-1901, RU-1847 and CRC/TRR-135, project number  
36 222641018). VB, XY, and HW are supported by CIHR and VISTA. PAK is supported by  
37 VISTA. JDC is supported by the Canada Research Chair Program.

38

39 **ABSTRACT:**

40

41 A remarkable feature of primate behavior is the ability to predict future events based on  
42 past experience and current sensory cues. To understand how the brain plans  
43 movements in the presence of *unstable* cues, we recorded gaze-related activity in the  
44 frontal cortex of two monkeys engaged in a quasi-predictable cue-conflict task. Animals  
45 were trained to look toward remembered visual targets in the presence of a landmark  
46 that shifted with fixed amplitude but randomized direction. As simulated by a  
47 probabilistic model based on known physiology/behavior, gaze end points assumed a  
48 circular distribution around the target, mirroring the possible directions of the landmark  
49 shift. This predictive strategy was reflected in frontal cortex activity (especially  
50 supplementary eye fields), which anticipated future gaze distributions *before* the actual  
51 landmark shift. In general, these results implicate prefrontal cortex in the predictive  
52 integration of environmental cues and their learned statistical properties to mitigate  
53 spatial uncertainty.

54

55

56

57

58 **INTRODUCTION:**

59

60 A major purpose of the brain is to create predictive internal models of the surrounding  
61 environment to prepare for imminent action <sup>1,2</sup>. This is challenging in a dynamic visual  
62 environment, with varying degrees of stability. But often we create expectations based  
63 on past probabilities, and these expectations manifest as behavioral strategies. For  
64 example, a soccer forward must integrate dynamic sensory information (goalie position  
65 relative to goal posts) with past knowledge of goalie behavior to aim the winning kick.  
66 Here, the forward is not just using visual landmarks to stabilize current spatial cognition  
67 <sup>3-9</sup>, but also to generate predictions. The challenge here is that one of these landmarks  
68 (the goalie) is himself moving and only partially predictable. To mitigate this spatial  
69 uncertainty, some neural mechanism must integrate current sensory information with  
70 past experience.

71 The prospective influence of visual landmarks for predictive behavior has received little  
72 attention compared with their retrospective influence on spatial coding. For example,  
73 humans and non-human primates appear to optimally weigh allocentric and egocentric  
74 visual cues in cue-conflict tasks, e.g., where a shift in allocentric landmarks causes  
75 reach and gaze to deviate in the same direction <sup>6,10,11</sup>. This behavior appears to involve  
76 neural computations in frontal cortex. In the absence of a visual landmark, gaze-related  
77 frontal activity simply grows more 'noisy' through time <sup>12-14</sup>. However, in the presence of  
78 a shifting landmark, both the frontal (FEF) and supplementary (SEF) eye fields detect  
79 these shifts, ultimately integrating this information into their egocentric (eye-centered)  
80 gaze commands <sup>15,16</sup>. However, other oculomotor studies suggest that these areas,

81 especially the SEF, are involved in predictive gaze behaviors<sup>17–19</sup>. We therefore  
82 hypothesized that frontal cortex (in particular SEF) might also be involved in predictive  
83 gaze behavior based on probabilistic spatial relations of environmental cues to future  
84 events.

85 We tested this hypothesis by simultaneously recording FEF and SEF neurons using the  
86 cue-conflict memory-guided saccade task developed and employed in our previous  
87 studies on the same animals<sup>11,15,16</sup> (**Fig. 1A**). In these previous studies, we showed a  
88 retrospective influence of a shifted visual landmark on gaze responses to a  
89 remembered visual target. But here, we focused on prospective coding, i.e., neural  
90 responses *before* the landmark shift. Guided by a theoretical framework based on  
91 prediction of probabilistic events and the neural computations noted above, we  
92 hypothesized that if the landmark shifted with a fixed amplitude but *random* direction, 1)  
93 animals might unconsciously develop a predictive gaze strategy to mitigate the future  
94 landmark influence<sup>1,2</sup>, and 2) this strategy might be encoded *prospectively* in frontal  
95 cortex activity, particularly the SEF. Indeed, we found that, 1) animals developed a  
96 circular distribution of final gaze positions around the target, slightly biased toward the  
97 actual shift, and 2) both FEF and (especially) SEF neurons predicted these final gaze  
98 distributions just *before* the actual landmark shift. Collectively, these results implicate a  
99 critical role of frontal cortex in the integration of environmental cues and their learned  
100 statistical properties to predict and mitigate spatial uncertainty.

## 101 **RESULTS:**

### 102 **Task**

103 To investigate how the brain might use visual landmarks to generate predictive gaze  
104 behavior, animals were trained on a cue-conflict task: a large landmark appeared in the  
105 background, then a target flashed briefly, followed by a surreptitious landmark shift  
106 (during a visual mask). Finally, animals were cued to aim their gaze toward the  
107 remembered target location (**Fig. 1A**). **Figure 1B** schematically shows 4 possible initial  
108 target-landmark configurations (**B1**) and the possible landmark shifts (**B2**). These shifts  
109 occurred in 1 of 8 directions around the original landmark location, but always had the  
110 same 8° amplitude, thereby forming a circular distribution. Animals were rewarded if  
111 gaze end points landed within 8-12° of the original target location (T, right panel), so  
112 that training did not bias their gaze behavior toward or away from the landmark shift.  
113 During experiments, the target position was varied throughout the visual field while  
114 randomly varying the relative landmark configuration and the direction of landmark shift.  
115 In previous experiments, we studied the influence of this landmark shift on subsequent  
116 premotor activity, and showed that it causes the one-dimensional distributions of final  
117 gaze position to shift in the same direction (**B3**)<sup>11,15,16</sup>.

118 It is noteworthy that animals spent several months learning and performing this task for  
119 a water reward (see methods), so they had ample opportunity to implicitly learn its  
120 probabilistic properties (i.e., a fixed amplitude, variable direction landmark shift<sup>15,16</sup>). To  
121 determine if these rules were incorporated into some predictive gaze control  
122 mechanism, here we analyzed final two-dimensional gaze distributions and examined  
123 neural activity *before* the actual landmark shift.

124

125

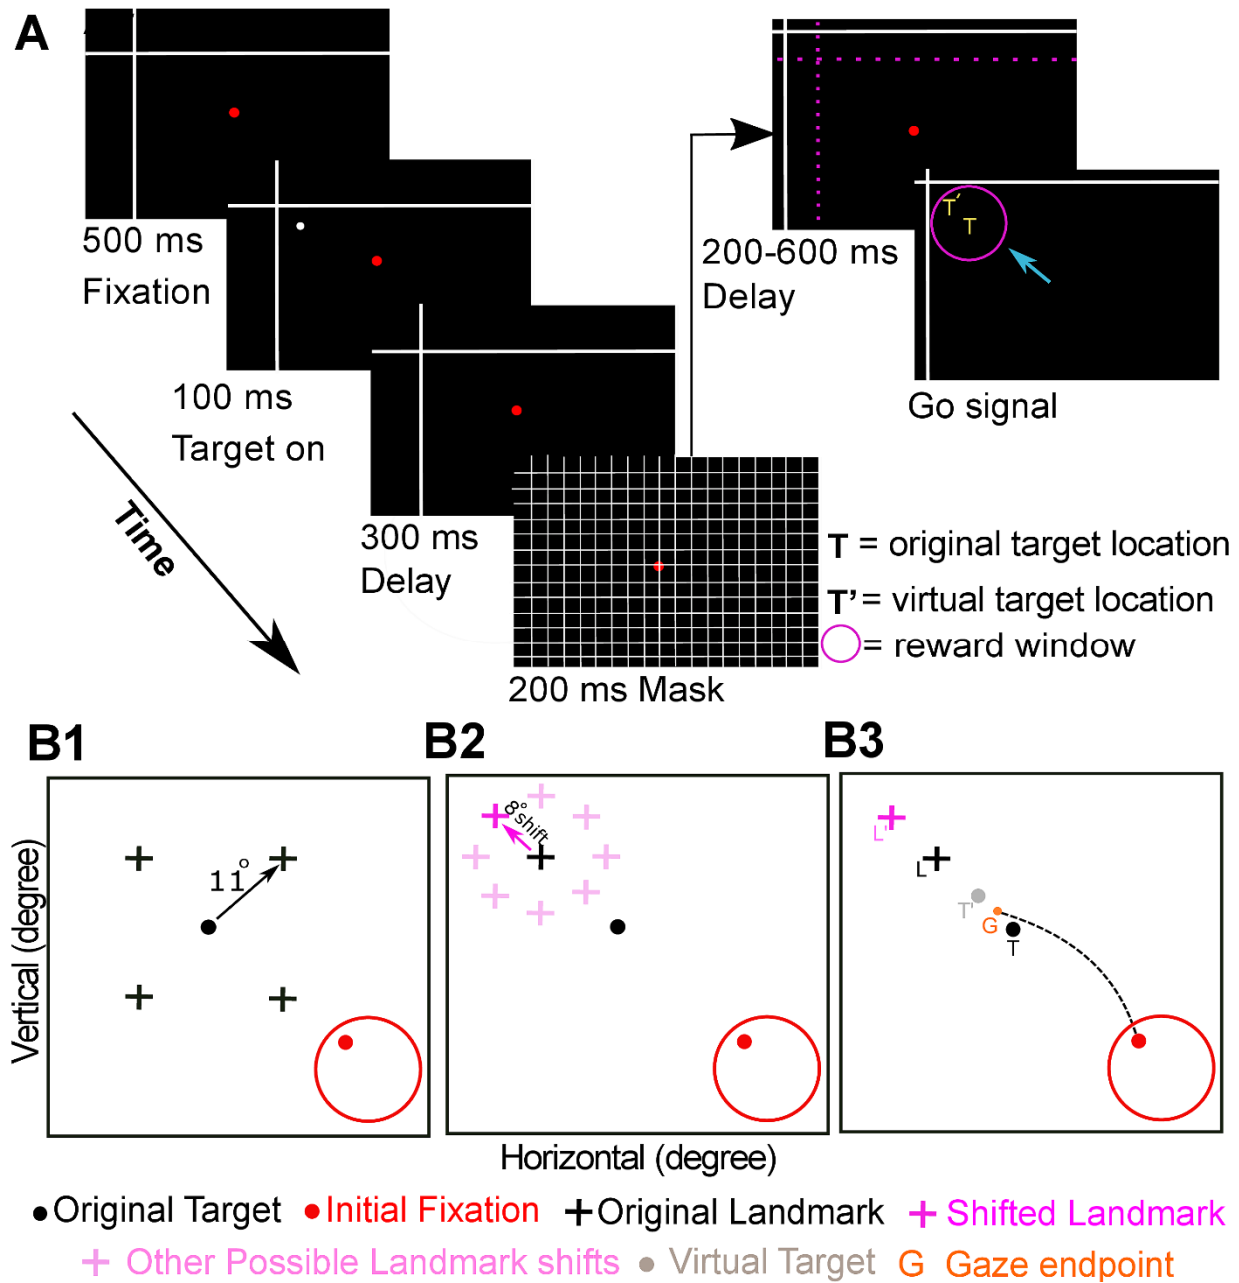

126

127

128

129

130

131

132

133

134

135

136

**Fig. 1. Experimental paradigm and behavior (A)** Cue-conflict experiment and its time course. The trial began by the monkey fixating on a red dot for 500 ms in the presence of a landmark (L, white intersecting lines) that was already present on the screen. A target (white dot) was then presented for 100 ms, followed by a first delay period of 300 ms and a grid-like mask (200 ms). After the mask, the landmark shifted (L') in one of eight radial directions around the original landmark. Post-mask, and after a second variable memory delay (200-600 ms), the animal was cued (fixation dot off, i.e., go signal) to saccade to the remembered location of the target T. Accordingly, the animal was rewarded for landing its gaze (G) within a radius of 8-12° centered on the original

137 *target (i.e., either for looking at  $T$  = original target, at  $T'$  = virtually shifted target fixed to*  
138 *landmark, or between  $T$  and  $T'$ ). The cyan arrow denotes the head-unrestrained gaze*  
139 *saccade to the remembered location. Note for clarity purpose, the landmark shift is*  
140 *exaggerated in the figure. Importantly, the pink, yellow and cyan items were never*  
141 *present on the screen and are only shown for illustrative purpose. (B1) Schematic of*  
142 *four possible oblique landmark locations (black cross) in relation to a specific target*  
143 *(black dot). The red dot represents the initial eye fixation and the red circle corresponds*  
144 *to the typical fixation jitter. (B2) Schematic of a possible post-mask landmark shift (eight*  
145 *possible directions,  $8^\circ$  each, light pink) for an example shift (dark pink) away from the*  
146 *target. Note the radial distribution of possible landmark shifts around the original*  
147 *landmark. (B3) Schematic of a gaze shift (broken black line) with the gaze endpoint (G)*  
148 *between  $T$  and  $T'$ .*

149

## 150 **Predictive Gaze Behavior: Actual and Simulated Distributions**

151 **Gaze Behavior.** Figure 2A summarizes the distributions of gaze end points, for our two  
152 animals. Gaze distributions (blue-yellow color scale) are plotted relative to the  
153 remembered target position  $T$  ( $0^\circ, 0^\circ$ ; black dot), and the pink dots represent idealized  
154 target locations ( $T'$ ) if they remained fixed to the landmark after shifting in the 8 possible  
155 directions (the dotted line connecting them represents the area where final gaze  
156 position gaze would result in a reward). The highest gaze densities (yellow) appear to  
157 cluster around the pink dots. At first glance one might assume that the animals simply  
158 waited for the landmark shift, and then deviated gaze in that direction, but in these plots,  
159 one cannot tell if there was any correlation between gaze and the actual shift direction.

160 To understand the real relationship between 2D gaze and the actual landmark shift, we  
161 rotated all of the data such that the direction of the actual landmark shift is always to the  
162 right (Fig. 2B). Now, the pink dot to the right represents the idealized target ( $T'$ ), and the  
163 other 7 lighter dots represent the potential targets for the seven landmark shifts that did  
164 not occur. Gaze endpoints still produced a circular distribution (Fig. 2B, upper panels),  
165 reminiscent of the potential directions of the landmark shift. This pattern was also



166 observed when each of the eight individual shift directions were analyzed separately  
 167 (**Supplementary Fig. 1**). In other words, animals ‘guessed’ at the radial distribution of  
 168 future landmark shifts, regardless of the actual direction of the landmark shift.

169 **Fig. 2. Gaze behavioral data and simulation (A):** 2-D distribution of the gaze  
 170 endpoints (36084 trials in animal L, 27651 in animal V) relative to the actual location  
 171 and directions of the landmark shifts. The black circle indicates the target position  $T$ , the  
 172 pink circles indicate the shifted target positions  $T'$ . The x-component is given by the

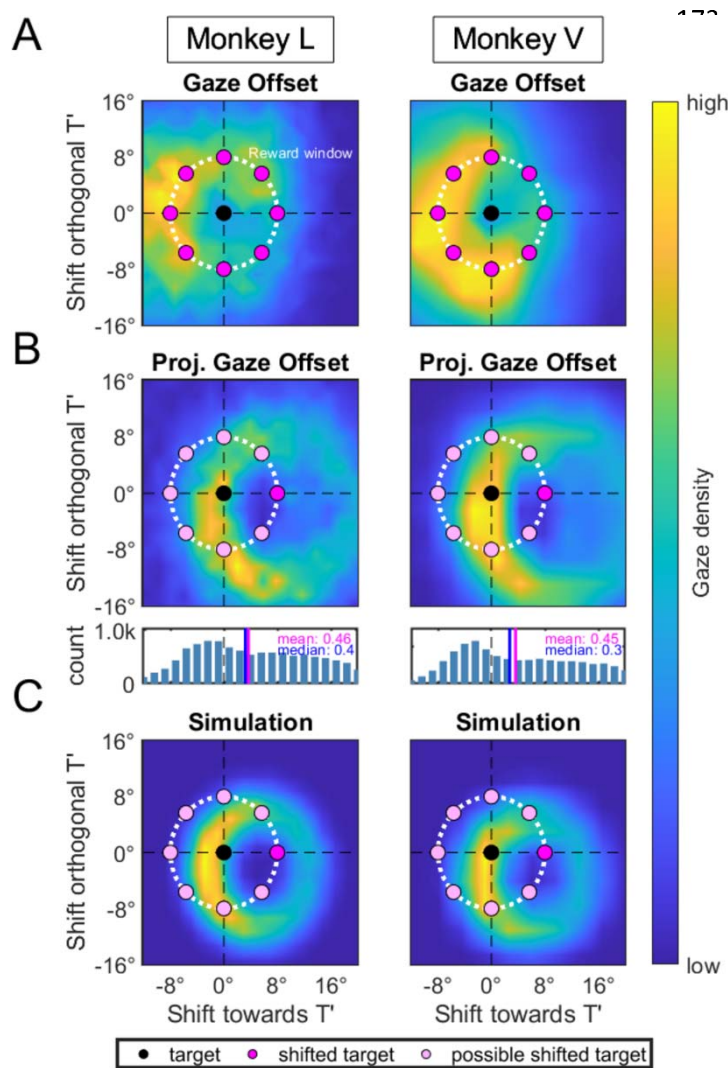

203 density of gaze endpoints in a crescent area next to the target. Bottom: the 1D  
 204 projection of the 2-D distribution of gaze endpoints along the direction of the landmark  
 205 shift for both animals shows a bias in this direction. The blue line indicates the mean  
 206 whereas the magenta line indicates the median. A comparison with the simulated data  
 207 (**C**) shows the similarity between the real and simulated data for both monkeys.



208

209

210 This does not mean that the actual landmark shift did not have an influence on gaze  
211 behavior. When data were collapsed into one dimension, i.e., shifts connecting T and T'  
212 (**Fig. 2B, bottom panels**), they confirmed our previous findings<sup>11,15,16</sup>: the overall gaze  
213 distributions were in fact shifted in the direction of the landmark shift ( $p < 0.01$ ; Wilcoxon  
214 Rank Sum test), by a median of  $3.2^\circ$  in animal L and  $2.4^\circ$  in animal V. Thus, overall,  
215 both animals produced a predictive, circular distribution of gaze end points (similar to  
216 the possible landmark shifts) that was biased in the direction of the actual landmark  
217 shift.

218 **Model.** The behavioral data described above appears to support our hypothesis that  
219 animals learned to expect a fixed-amplitude landmark shift of varying direction. To  
220 understand how they might do this (and to make neurophysiological predictions), we  
221 developed a probabilistic model based on two known properties of the gaze control  
222 system, and one hypothetical property (see methods for mathematical description). The  
223 known properties are that 1) target memory is initially fairly precise but then  
224 progressively degrades through time, resulting in a broader distribution of variable gaze  
225 errors<sup>12,13,20</sup> and that 2) the landmark shift influences subsequent premotor codes,  
226 resulting in a shifted distribution of gaze end points<sup>15,16</sup>. The third and novel component  
227 of the model is a 'guess' concerning the future landmark shift. Since the direction is  
228 unknown, this component results in a circular distribution of gaze estimates. We allowed  
229 these three model components (prediction, noise, actual shift influence) to "guess" a

230 saccade vector and then calculated the weighted average across them to simulate the  
231 expected gaze distribution in our task.

232 After adjusting the model parameters (see methods), the simulated output almost  
233 exactly replicated the data (**Fig. 2C**), i.e., a ring-like distribution of gaze endpoints that  
234 was densest near the target but shifted in the direction of the landmark shift. (with a  
235 correlation of 0.81 and 0.81 between the actual and simulated data for monkey L and V  
236 respectively). Conversely, if we removed the predictive element of the model it resulted  
237 in a shifted gaussian distribution of gaze endpoints. Consistent with this, when we  
238 subtracted no-shift trials from the shift trials (**Supplementary Fig. 2**), the circular  
239 distribution collapsed to a shifted gaussian. These two findings confirm that the actual  
240 gaze distributions were a result of a probabilistic process, where landmark prediction  
241 explained the circular distribution, actual landmark influence explained the overall bias  
242 in this distribution, and interactions with a degraded target representation caused  
243 greater gaze density near the target. Again, the physiological basis of the latter two  
244 phenomena have already been described<sup>13,15,16</sup>, but, the model makes a new and  
245 strong prediction: there must be some neural mechanism that predicts the future  
246 landmark influence before it actually happens.

#### 247 **Neural Analysis: SEF predicts the future gaze distribution.**

248 The model described above suggests that the gaze control system implicitly anticipates  
249 the amplitude and guesses the direction of an impending probabilistic landmark shift,  
250 ultimately influencing the actual distribution of future gaze saccades. Based on the  
251 literature of oculomotor prediction<sup>21-24</sup>, we expected the prefrontal gaze system,

252 especially the SEF, to play a prominent role in this strategy. If so, their predictive neural  
253 signals should pass two criteria: 1) they should be present before the actual landmark  
254 shift, and 2) since the predictive strategy dominated final gaze position (**Fig. 2B**) then  
255 these signals should encode the observed deviations of final gaze from the original  
256 target.

257  
258

259 To test this hypothesis, we analyzed early (pre-landmark shift) activity from 312 FEF  
260 and 256 SEF neurons recorded during the task described above (**Fig. 3A**). During  
261 experiments, we recorded neural response fields (the area of space that modulates  
262 neural activity). Targets were presented throughout the response field of each neuron,  
263 while randomly varying the 4 landmark configurations, and the 8 landmark shift  
264 directions. Consistent with previous studies, many of our neurons, especially in SEF  
265 <sup>25,26</sup>, did not show significant spatial tuning. After removing these and applying our other  
266 exclusion criteria (see METHODS), we were left with 147 FEF and 68 SEF neurons for  
267 analysis. Mean spike density plots for these neuron populations, up until the landmark  
268 shift, are shown in **Figure 3B**. In both areas, visual targets evoked a strong visual  
269 response, followed by a lower-level memory response that lasted past the landmark  
270 shift <sup>15,16</sup>. The 7 half-overlapping time steps shown above these plots show the temporal  
271 windows that we used in the following analysis. We then tested if activity predicted gaze  
272 in any of these periods.

273 To do this, we characterized if neurons were coding original target location (T), the  
274 future final gaze position (G), or something in between, called the 'T-G continuum'

275 (discretized in ten steps), calculated relative to initial eye orientation<sup>12,13,15,16,27</sup>. In this  
276 analysis, a value of 0 indicates a pure target-relative-to-eye encoding, while a value of 1  
277 indicates a final-gaze-relative-to-eye encoding, values between 0-1 indicate an  
278 intermediate code, and values beyond 0 / 1 could indicate a negative (perhaps  
279 inhibitory) influence of the opposite factor (**Fig. 3C1**). This analysis allowed us to plot  
280 the response field data in each of these coordinate frames, and to perform a non-  
281 parametric fit to each dataset<sup>28</sup>. The one spatial step (out of ten, see above) that  
282 yielded the lowest residuals (deviations)

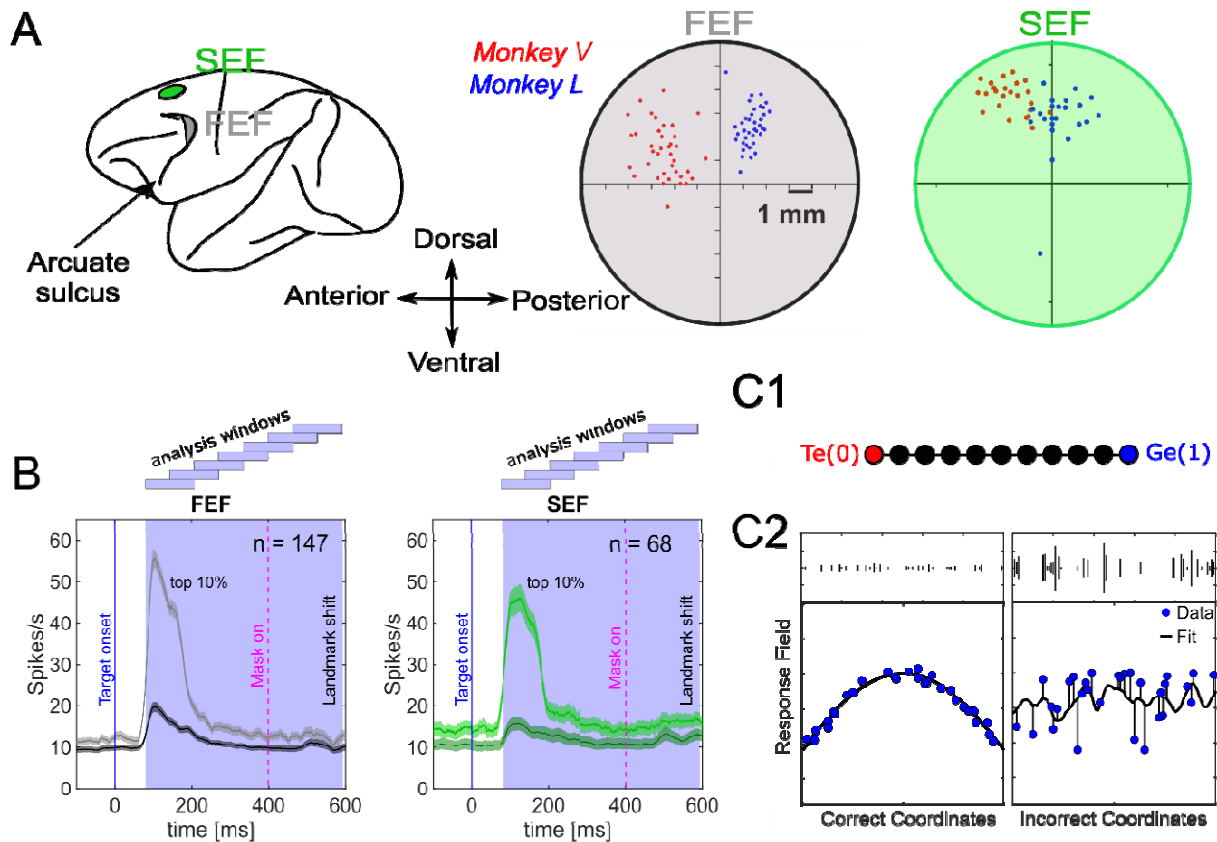

283

284 **Figure 3. SEF and FEF recordings** (A) Left: The green and the gray sites represent  
285 the location of the SEF and FEF respectively. Right: Zoomed-in overlapped sections  
286 for FEF and SEF with sites of neural recordings (dots) that were confirmed with 50  
287  $\mu$ A current micro-stimulation. Blue and red dots correspond to recordings sites in

288 *Monkey L and Monkey V respectively. (B) Mean ( $\pm$  95 % confidence) of the spike-*  
289 *density plots from target onset until landmark shift [dark; all trials from all neurons;*  
290 *light: top 10% best trials most likely depicting the hot spot activity of every neuron's*  
291 *response field (RF) in visual responses, aligned to target onset (blue vertical line)].*  
292 *The blue shaded region corresponds to the analysis window divided into 7 half-*  
293 *overlapping  $x$  ms wide time-steps, as depicted above the shaded area. (C) A*  
294 *schematic behind the logic of response field analysis. (C1) Shown is a schematic of*  
295 *the continuum between  $Te(0)$  and  $Ge(1)$  with intermediate steps. (C2) The X-axis*  
296 *denotes the coordinate frame, and the Y-axis represents the corresponding activity.*  
297 *Briefly, if the activity related to a specific target is plotted in the correct/best*  
298 *reference frame, this will result in lowest residuals, i.e., if the neural activity to a*  
299 *target is fixed (left) then the data (blue) would fit (black curve) better on that, yielding*  
300 *lower residuals compared with when the activity is plotted in an incorrect frame,*  
301 *yielding higher residuals (right).*  
302

303 between the actual neural responses and the fit was deemed to provide the best fit and  
304 hence indicate the coordinate system employed by a given neuron at a given time (**Fig.**  
305 **3C2**). We performed this analysis for each of the time steps shown in **Figure 3B**, to  
306 track the temporal evolution of the spatial coding before the landmark shift. Note since  
307  $G$  is derived from the *actual* gaze data constituting the predictive distribution in **Figure**  
308 **2**, neurons / populations that approach  $G$  must be involved in prediction.

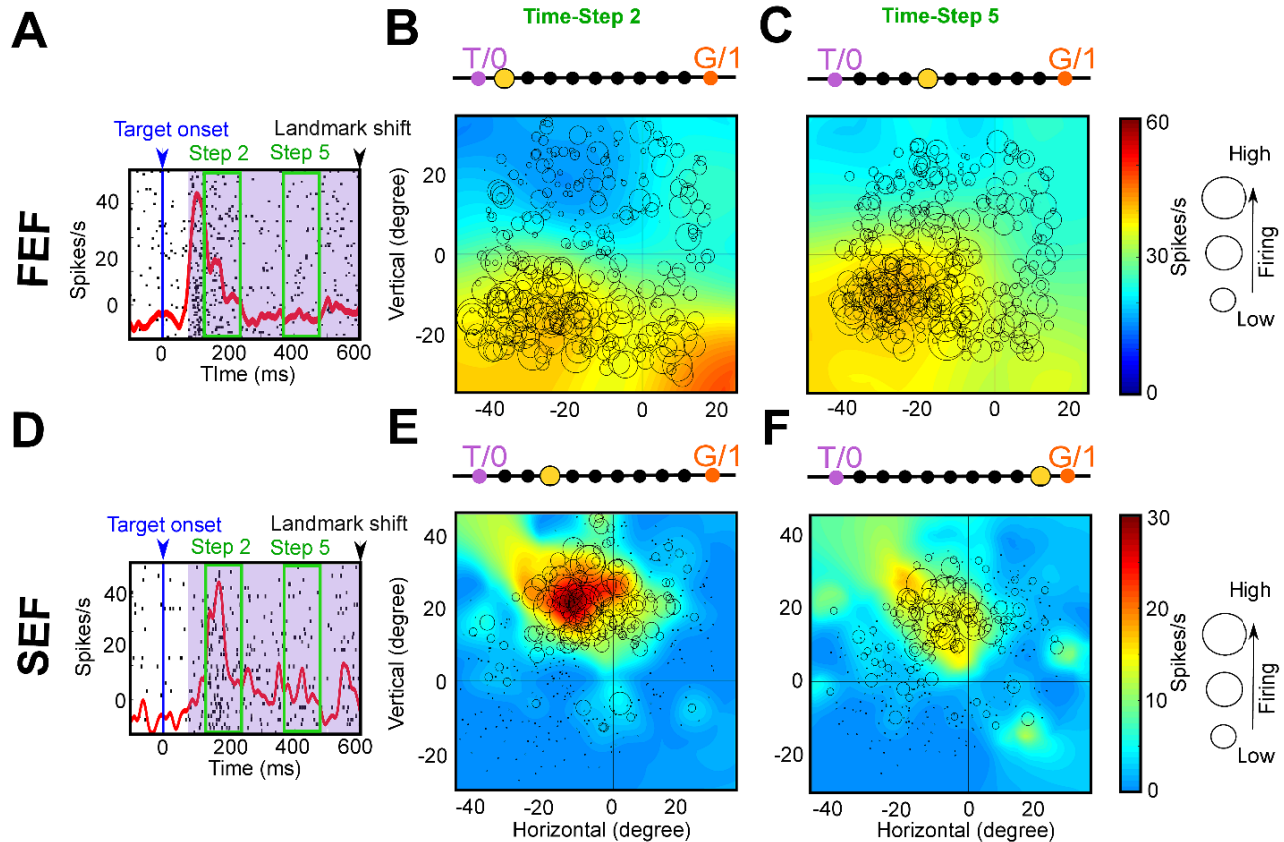

309

310 **Figure 4. Typical examples of spatial encoding of an SEF and FEF neuron (A)**  
 311 *Raster with spike density plot (red curve) for the FEF neuron. The blue arrow*  
 312 *corresponds to the target onset and the blue shaded area represents the analysis*  
 313 *window divided into 7 half-overlapping time-steps. The green rectangles correspond to*  
 314 *the time-steps 2 and 5. (B) Response field plot at time-step 2. The response field fits at*  
 315 *1<sup>st</sup> point from T. The yellow blob represents the hot spot of the response field. (C)*  
 316 *Response field plot at time step 5 and it fits best at 4<sup>th</sup> step from T. (D) Same*  
 317 *convention as A but for SEF neuron. (E) Response field plot at time-step 2 and it fits*  
 318 *best at 3<sup>d</sup> point from T. (F) Response field at time step 5 and it fits best at 9<sup>th</sup> point from*  
 319 *T suggesting a predictive shift toward gaze. The color bar stands for both response*  
 320 *fields. The circle size is proportional to response magnitude. Note: 0,0 denotes the*  
 321 *center of the coordinate system (the fovea) that yielded lowest residuals (best fit).*

322

323 **Figure 4** shows a typical example of the response field fitting for an FEF (upper row)  
 324 and an SEF (lower row) neuron. The leftward panels (A, D) display raster with the spike  
 325 density plot for these neurons, aligned to the target onset (blue arrow). The blue shaded

326 area corresponds to the analysis window that is divided into our 7 half-overlapping time-  
327 steps. To the right of these plots are response fields calculated at the 2<sup>nd</sup> and 5<sup>th</sup> time  
328 steps (indicated by green rectangles in A/D) and plotted in their best T-G coordinate  
329 frame (indicated by the yellow dot on the scale above each plot). Each circle in the  
330 response field map corresponds to neural activity from a single trial, where the larger  
331 the circle the larger the response (i.e., number of action potentials). The colored heat  
332 maps represent the non-parametric fit to these data, where red depicts the ‘hot-spot’.

333 At time step 2 (**Fig. 4 B/E**; spanning the late phasic response to target presentation),  
334 both the SEF and FEF examples show a best fit near T, indicating that these neurons  
335 were coding target location relative to the eye. At time step 5 (**Fig. 4 C/F**; just after mask  
336 onset, and just before the anticipated landmark shift), there were no obvious shifts in the  
337 response fields. However, there were shifts in the best T-G fits, signifying a change in  
338 the underlying neural code. In the FEF example, there was a 30% shift toward G,  
339 signifying a closer relation to future gaze position. Further, the SEF example shifted  
340 90% toward G. This means that this SEF neuron was predicting the circular distribution  
341 of gaze deviations from T, on a trial-by-trial basis, just before the actual landmark shift.

342 To document these observations through time, we pooled the T-G fits across all FEF (n  
343 =147) and across all SEF (n = 68) neurons and then analyzed each population code as  
344 a function of time (**Fig. 5**). **Figure 5A** illustrates the mean spike density plots for the  
345 SEF and FEF neurons across 7 time steps ranging from visual response onset until the  
346 (invisible) landmark shift. The pink shaded area corresponds to the duration of the  
347 mask.



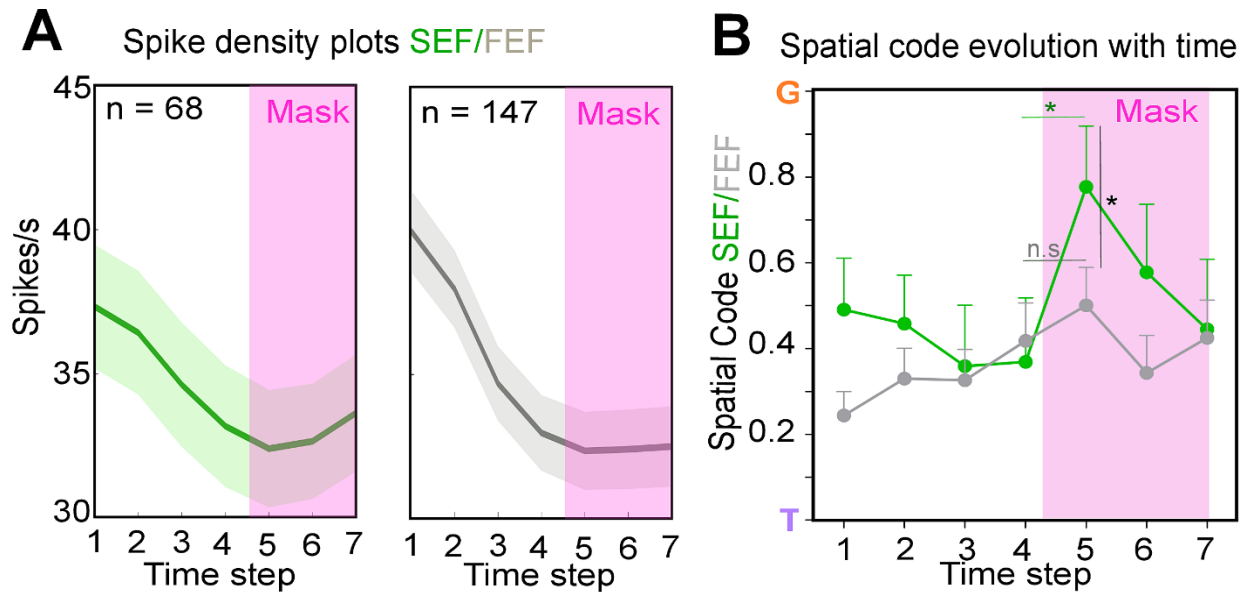

348

349 **Figure 5: Spatial code evolution with time. (A)** Spike density plots (mean  $\pm$  SEM) for  
350 SEF (green) and FEF (gray) from visual response onset until the landmark shift divided  
351 into 7-half overlapping time-steps. **(B)** Spatial code evolution with time for SEF (green)  
352 and FEF (gray) neurons along the target-to-gaze (T-G) continuum. A sudden predictive  
353 shift toward G was noticed for SEF neurons at 5<sup>th</sup> step that significantly differed from  
354 corresponding FEF step ( $p = 0.028$ , unpaired  $t$ -test) and the 4<sup>th</sup> SEF step ( $p = 0.02$ ,  
355 unpaired  $t$ -test). The pink area corresponds to the duration of the mask.

356

357 Both the FEF and SEF showed significant deviations from T at all time steps, which  
358 could partially be accounted for by the degraded T representation in our model.  
359 However, they followed different time courses. For the FEF (grey symbols and curve),  
360 there was a gradual progression from T towards G coding along the time-steps, as  
361 noted previously<sup>12,15</sup>. However, for the SEF population (**Fig. 5B**, green symbols and  
362 curve) the spatial code already started midway between T and G at time-step 1 (the  
363 visual response to the target in the presence of the landmark) with a significantly greater  
364 shift than FEF ( $p=0.01$ , Mann-Whitney test). Then, after reverting toward the FEF curve  
365 for several steps in the memory period, the SEF again displayed a sudden shift of 78 %  
366 toward G at time-step 5 (just after mask onset and just before the probabilistic landmark

367 shift), with a significantly greater shift than FEF ( $p = 0.028$ , Mann-Whitney test).  
 368 Further, there was a significant difference between the 4<sup>th</sup> and 5<sup>th</sup> steps for the SEF ( $p =$   
 369  $0.02$ , unpaired t-test). The FEF appears to follow a small trend at this point, but this did  
 370 not reach significance ( $p > 0.05$ , Mann Whitney test) population. These data suggest  
 371 that the SEF played a special role in predicting future gaze direction, just before the  
 372 landmark shift, including (and possibly causing) the trial-to-trial ‘guess’ at the direction of  
 373 landmark shift.

374 **Figure 6: Detailed evolution of spatial codes through time.** (A) Violin plots for FEF  
 375 (top) and SEF (bottom). The width of each plot indicates the relative number of neurons  
 376 with fits at a particular point on the T-G continuum. The mean of each distribution is  
 377 indicated by the red line and median by the blue line. Such plots combine the strengths  
 378 of bar graphs and frequency histograms (arranged in the vertical dimension), (B)

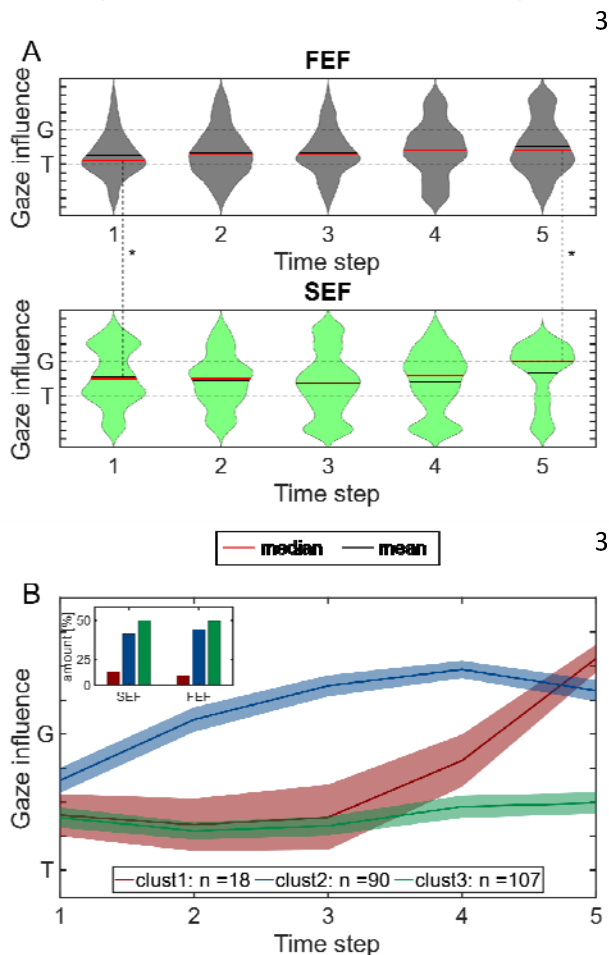

379 Dissociation of neurons into three  
 380 distinct (colour coded) clusters of  
 381 neurons using a clustering approach.  
 382 The main graph plots means and  
 383 confidence intervals of T-G fits for the  
 384 combined FEF/SEF population,  
 385 plotted through five time steps. Inset  
 386 shows the relative numbers of  
 387 neurons in SEF and FEF that fit  
 388 within these three clusters.

391 To illustrate how this predictive shift  
 392 occurred across the full distribution of  
 393 our FEF and SEF populations, we  
 394 computed ‘violin’ plot fits to the T-G  
 395 distributions of all spatially tuned  
 396 neurons (Fig. 6) for time steps 1-5  
 397 (where the G prediction peaked).

397 These populations showed means and medians between T and G, but extend beyond T  
398 and G, a phenomenon that has been noted in previous studies of intermediate  
399 reference frames in both real and artificial neural populations<sup>12,15,16,20,29–31</sup>. Both  
400 populations revealed relatively stable code distributions for the first 3 time steps. The  
401 FEF showed a simpler distribution that remained fairly stable, except for the slight  
402 expansion of a bimodal ‘head’ at time steps 4 and 5. In contrast, the more complex SEF  
403 population distribution started to shift upward at step 4, with a dramatic upward shift at  
404 step 5.

405  
406 Finally, to test if distinct sub-populations of neurons contribute differently to these  
407 coding shifts through time, we employed a dimensionality reduction approach on the  
408 first five time-steps by hierarchical clustering. To be objective, (and because FEF and  
409 SEF are highly interconnected with similar responses) we pooled neurons from both  
410 areas for this analysis. We then used the Ward method in conjunction with the Euclidian  
411 metric (see methods) to identify clusters of neurons within the spatiotemporal (T-G fit  
412 versus time) coding patterns of the entire population. This resulted in three distinct  
413 neuron clusters (**Fig. 6B**), somewhat reminiscent of the three components in our model.  
414 Cluster 1 (red) neurons showed a predictive shift toward G beginning at step 3 and  
415 peaking at step 5, resembling the predictive response seen in the whole population  
416 analysis. Cluster 2 (blue) neurons reached and maintained preference gaze coding as  
417 early as the second step, whereas cluster 3 (green) neurons maintaining a slightly  
418 degraded target code. Proportionately, more SEF neurons (10.3%) participated in  
419 cluster 1 compared to FEF (7.5%), whereas both areas contributed nearly equally

420 (39.7% SEF/ 42.8% FEF in cluster 2; 50% SEF/ 49.7% FEF in cluster 3) to the other  
421 clusters (**Fig. 6B**, *inset*). This analysis suggests a considerable degree of signal sharing  
422 between FEF and SEF, but this signal distribution manifests itself differently in their  
423 whole population codes (**Figs. 5, 6A**). This sharing may explain why the overall FEF  
424 population shows a small trend toward gaze prediction, whereas the SEF explicitly  
425 predicts final gaze direction, coding (and perhaps producing) a strategy to mitigate the  
426 expected future landmark influence.

427

## 428 **DISCUSSION**

429

430 To investigate how the frontal cortex (FEF and SEF) integrates environmental cues and  
431 learned probabilities for predictive gaze behavior, we used a cue-conflict memory-  
432 guided saccade task, where a visual landmark shifted in a quasi-predictive radial pattern  
433 after a mask. We found that: 1) final gaze formed a circular pattern around the original  
434 target, resembling the shift probability distribution but slightly biased in the direction of  
435 actual shift, 2) a probabilistic model of the above data yielded a circular pattern that was  
436 strikingly similar to the real data. 3) this behavioral strategy was reflected in  
437 supplementary eye field response fields, which showed a transition to gaze coding just  
438 before the actual landmark shift and 4) a clustering algorithm dissociated three types of  
439 neurons in both areas, suggesting a shared modular specificity. Collectively, this study  
440 provides new insights into how the brain uses visual cues for predictive, probabilistic  
441 gaze behavior, especially in a dynamic but quasi-predictable visual environment.

## 442 **Relation to previous behavioral studies**

443 Various previous studies have addressed the use of landmarks in the retrospective  
444 coding of target memory for action planning<sup>32–35</sup>, and other studies have considered the  
445 prospective use of cues for predictive gaze coding<sup>2,36,37</sup>, but here we considered  
446 the combination of these two factors for spatial behavior involving probabilistic  
447 environmental cues. In our task, an environmental cue that would normally augment  
448 visual stability<sup>38,39</sup> becomes unstable. Imagine if you used a certain landmark to  
449 navigate to work every day, but some malicious prankster started relocating it every  
450 night. After a while, one might learn to predict and mitigate the effects of this trick, either  
451 by choosing other landmarks, or learning the trickster's pattern. Although our task was  
452 visually impoverished compared with this example, the general principle of combining  
453 environmental cues and prediction based on prior knowledge appears to be a central  
454 (some might say primary) aspect of gaze control and brain function in general for real  
455 world behavior<sup>37,40</sup>. Thus, although the mechanisms observed here pertain to a very  
456 specific task, they likely generalize to many other daily tasks, i.e., wherever there is  
457 spatial uncertainty in our future environment.

458

459 In the gaze control system, it has been suggested that spatial predictions based on  
460 environmental cues guide goal selection<sup>36,37,40,41</sup>. Prior knowledge/memory  
461 representation facilitates visual search<sup>42</sup>, influences goal-directed movements to the  
462 target<sup>43,44</sup>, allows predictions based on the history and motion of a target<sup>45–47</sup>.  
463 Moreover, it has been proposed that many aspects of behavior are governed by  
464 Bayesian models. Previous studies have shown that the brain integrates visual  
465 landmarks with target information in a Bayesian fashion for gaze control<sup>11,15,48,49</sup> and

466 other goal-directed movements<sup>5,6,50,51</sup>. In one study<sup>52</sup>, a target acquisition model (TAM)  
467 based on a *target map* (essentially the proposed/possible locations for gaze in a defined  
468 scene) exhibited similar levels of performance as human participants for a target search  
469 from a set of previewed targets and identical display later on, suggesting that the brain  
470 creates a probabilistic map of possible targets. Furthermore, it is widely shown that the  
471 brain creates cognitive maps through repetitive reinforcement, learning, prediction and  
472 reward maximization<sup>53,54</sup>.

473  
474 The landmark shifts in this experiment were masked, but even if monkeys ‘noticed’ the  
475 change in position, it seems unlikely that they developed a ‘conscious’ predictive  
476 strategy to deal with the landmark shifts. For example, humans are influenced by  
477 landmark shifts even when told to ignore them<sup>6</sup>. Instead, it seems likely that their  
478 strategy was learned implicitly over the course of many thousands of trials during  
479 training and data collection. The constant repetition of a landmark shift with a fixed  
480 amplitude but variable direction may have allowed the brain to generate a probabilistic  
481 map of the distribution of possible landmark shifts, as in our model. And the actual  
482 influence of a landmark shift appears to be developed naturally as a prior<sup>2,37,52</sup>. By  
483 combining a probabilistic map with a noisy gaze distribution and the influence of the  
484 actual target shift, our model was able to replicate the actual gaze strategy (**Fig. 2 C**).  
485 But how could the brain achieve this?

### 486 **A neural algorithm for landmark-based gaze prediction**

487 In this section we link the behavioral data to our neurophysiology by speculating how  
488 the steps in our model could relate to internal brain events. In **Figure 7**, we have

489 speculatively superimposed simulations of the three main model components (*Rows*  
490 *R1-3*) against the seven main events of our task (*Columns C1-7*). Each panel  
491 represents the contribution of the corresponding model component to the relevant  
492 event. As in **Figure 2C**, the simulation shows probability distribution of gaze end points  
493 around the target, superimposed on a circle showing the possible directions of the  
494 landmark shift (with the actual shift direction normalized to the right). *Row 1* illustrates a  
495 Gaussian representation of target position, which is initially fairly precise (*R1,C2*) but  
496 then progressively degrades through time, resulting in a broader distribution of variable  
497 gaze errors by the time of the final gaze command (*R1,C6*). This has already been  
498 observed both in behavior and in FEF memory responses<sup>12,13</sup>. It is noteworthy that in  
499 our model this area corresponded to the spatial ‘reward window’ provided to the  
500 monkey, suggesting a constrain related to reward maximization<sup>55</sup>. *Row 3* shows the  
501 influence of the actual landmark shift, resulting in a partial shift in the gaze distribution in  
502 the same direction (*R3,C4*). This has been observed in the premotor FEF/SEF  
503 responses that follows the landmark shift<sup>15,16</sup> and can be explained by optimal  
504 integration theory<sup>6,56</sup>.

505 *Importantly, row 2* shows the novel aspect of the model. Here, our SEF data suggest  
506 that predictive information about the future landmark influence is already present  
507 (perhaps at the synaptic level) when the visual target response interacts with the  
508 background landmark (*R2,C2*). Second, the high (78%) SEF gaze prediction during this  
509 mask (*R2,C3*) suggests that the mask might ‘warn’ of the upcoming landmark shift,  
510 triggering a comparison between the target representation and the landmark prediction  
511 that produces the future circular gaze distribution (minus only the bias due to the actual



512 shift). Finally, when this probability distribution combines with the other two probability  
513 distributions (gaussian gaze error and influence of the landmark shift) to produce the  
514 final motor command (*Column 7*), it results in a ring-like distribution of gaze end points  
515 that is somewhat denser near the target but shifted in the direction of the landmark shift.  
516 Note that individual trials are directed pseudorandomly (as in our data) but the overall  
517 gaze distribution maximizes reward across trials. Overall, this strategy maximizes  
518 reward outcome based on visual cues and their link to expected probabilistic events  
519 <sup>57,58</sup>. In lay terms, the model makes an educated ‘guess’. Accordingly, this approach  
520 provides a model framework for understanding how neurons might actually implement  
521 such algorithms.

## 522 **Neural Implementation: role of the SEF and FEF**

523  
524 While both the FEF and SEF showed a trend toward gaze coding early in the task, the  
525 slow rise in FEF could be interpreted as noise accumulation <sup>12,13,15</sup>. However, the SEF  
526 passed both our criteria for predictive coding: it showed a sudden shift toward gaze  
527 coding (along with its prediction-dominated circular pattern of gaze deviations) just  
528 *before* the actual landmark shift. FEF and SEF are reciprocally interconnected and  
529 show similar

530 -

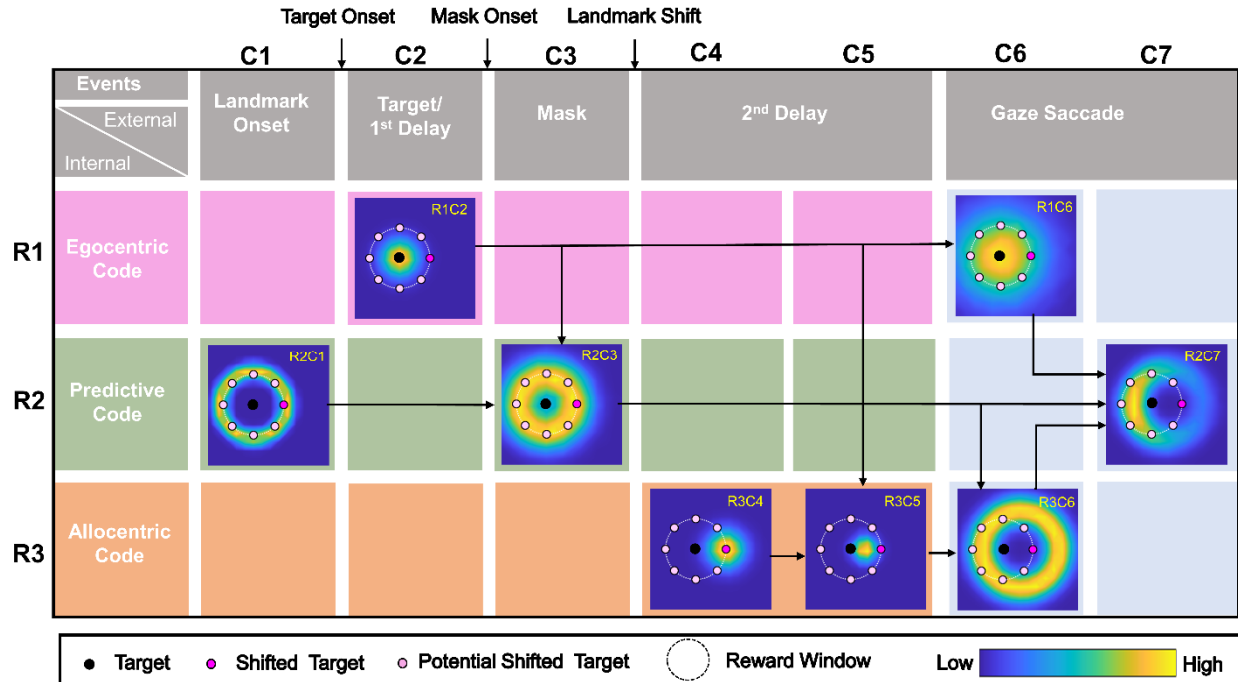

531

532

533 **Figure 7:** Schematic representation of the contributions of the three major components  
 534 of our model (rows R1-3) with respect to the 7 major events in our task (Columns C1-7).  
 535 The small pictograms show 2D simulations of gaze distributions produced by the model  
 536 components during key events. As in **Figure 2C**, simulations are directionally  
 537 normalized so that the landmark shift is to the right. In each simulation, the black dot  
 538 represents the target, the magenta dot represents the virtually shifted target ( $T'$ ), the  
 539 light-colored magenta dots represent potential target shifts that did not occur, and the  
 540 dashed white circle indicates the minimal reward window used during the experiment.  
 541 See Results text for explanation and methods for mathematical details of the  
 542 simulations.

543

544 properties, but the general consensus is that the FEF is more tightly linked to the  
 545 generation of saccades. In contrast, the SEF holds 'executive' control and influences  
 546 oculomotor centers with a multitude of signals such as reward, prediction, decision  
 547 making, learning, rank dependency, surprise, conflict monitoring and behavioral  
 548 supervision<sup>22,24</sup>. Both areas are involved in eye-centered and allocentric visuomotor  
 549 transformations<sup>12,13,15,16</sup>, but the SEF is also implicated in object-centered coding<sup>59,60</sup>.

550 Furthermore, the SEF encodes two types of errors that are relevant for learning and  
551 prediction: 1) amount of reward, and 2) subjective probability of feedback <sup>21</sup>.

552 Based on our model (**Fig. 7**) and the general principle of reward/effort maximization  
553 <sup>57,58</sup>, we propose the following explanation for our neurophysiological data. Our previous  
554 results suggest that the FEF and SEF continue to show an eye-centered target-relative-  
555 to-eye to gaze-relative-to-eye transformation for saccades in the presence of a  
556 landmark <sup>15,16</sup>, but their visual signals are influenced by landmarks in a fashion that  
557 depends on target-landmark configuration <sup>32</sup>. Thus target-landmark configuration  
558 information is present from the start of each trial, but our new data here suggest that  
559 these interactions are influenced over time by the expectation of future probabilistic  
560 events and reward <sup>16,61</sup>.

561 Overall, the three population clusters identified in **Figure 6** are somewhat reminiscent of  
562 the three conceptual channels in our model, but the analogy is not perfect. One (**Fig.**  
563 **6B**: green) seems to maintain a slightly noisy target code, one (red) appears to be  
564 involved in prediction just before the landmark shift, and the progressive transition in the  
565 third (blue) could be interpreted either as noise build up or prediction. However, one  
566 cannot know if the analysis algorithm is separating clusters on the same basis as our  
567 conceptual model.

568 Despite the general similarities between FEF and SEF distribution across clusters, our  
569 current data suggest that only the SEF plays a stronger role in the predictive gaze  
570 strategy: only SEF shows a significant shift toward gaze coding just before the landmark  
571 shift, perhaps triggered by visual input from the mask. Although it is not possible to infer

572 causality from neural activity alone (particularly in such a highly interconnected system),  
573 we propose that the circular distribution of gaze positions around the target originates in  
574 the predictive SEF code. Interestingly, this predictive peak in the SEF coding then  
575 dissipates somewhat, perhaps exerting its influence thereafter through synaptic  
576 modulation of distribution of signals across the SEF — posterior parietal cortex,  
577 dorsolateral prefrontal cortex — FEF memory loop<sup>62–64</sup>. Most likely prefrontal predictive  
578 activity influences final motor output in both structures, because SEF and FEF motor  
579 responses encode future gaze position in this task<sup>15,16</sup>, which must include the circular  
580 patterns observed here in the behavior. One would expect the same to hold true in the  
581 motor response of the superior colliculus.

582 As we observed previously, the actual landmark shift influence appears during the  
583 following delay activity in both the FEF and SEF, through slightly different and  
584 complementary mechanisms (specifically the balance of activity in visuomotor vs. motor  
585 neurons<sup>15,16</sup>). This would implement the shift in the ‘donut’ shown here (**Fig. 2**). Initially  
586 these allocentric and egocentric signals were multiplexed in separate codes, but  
587 became fully integrated in the final motor response, as they must to influence the actual  
588 behavior.

589  
590 In short, we are able to explain most of the behavior described here in terms of our own  
591 data and previous literature, with a minimum of speculation. This explanation is  
592 admittedly highly specific to the current task and training, but it is exceedingly unlikely  
593 that these circuits developed for such a specialized purpose. More likely, the circuits  
594 described here illustrate the flexible capacity of this system to contribute to predictive

595 strategies based on learned environmental heuristics, and thus should generalize to  
596 other situations.

## 597 **General Conclusions and implications**

598 Prediction is fundamental to brain function and gaze behavior <sup>37,65</sup>, but becomes  
599 challenging when environmental cues themselves are unstable. In such situations, the  
600 brain can only incorporate experienced statistical properties of the environment, and  
601 then essentially ‘guess’ at the properties that remain uncertain. Using a quasi-  
602 predictable gaze paradigm involving a series of visual cues (a landmark, a target, a  
603 mask, and landmark shift in an unpredictable direction) we showed that 1) Rhesus  
604 macaques developed a predictive strategy to — most likely implicitly — anticipate the  
605 future consequences of a probabilistic landmark shift, and 2) that frontal cortex (SEF in  
606 particular) carries and perhaps produces the predictive signals that underlie this  
607 behavior. This shows that frontal cortex is involved in the use of environmental cues and  
608 the learned statistics of their future motion to generate predictive behaviours. It is likely  
609 that this role of frontal cortex generalizes to other visual behaviors, i.e., whenever  
610 movements are planned in the presence of spatial uncertainty. Conversely, frontal  
611 damage should adversely affect one’s ability to generate predictive behavior in a  
612 dynamic environment.

## 613 **MATERIALS AND METHODS:**

### 614 **Surgical Procedures and Recordings of 3D Gaze, Eye, and Head**

615  
616  
617  
618  
619

620 The experimental protocols followed the guidelines of Canadian Council on Animal Care  
621 on the use of laboratory animals and were also approved by the York University Animal  
622 Care Committee. Neuronal recordings were done on two female *Macaca mulatta*  
623 monkeys (Monkey V and Monkey L). Their left eyes were implanted with 2D and 3D  
624 scleral search coils for eye-movement recordings<sup>66,67</sup>. The eye coils permitted us to  
625 register 3D movements of the eyes (i.e., gaze) and orientation (horizontal, vertical, and  
626 torsional components of eye orientation relative to space). Two head coils (orthogonal  
627 to each other) were also connected during the experiment that allowed similar  
628 recordings of the orientation of the head in space. Then, in both animals a recording  
629 chamber was implanted on FEF and SEF, centered in stereotaxic coordinates at 25 mm  
630 anterior and 19 mm lateral for FEF and 25 mm anterior and 0 mm lateral for SEF. A  
631 craniotomy of 19 mm (diameter) on FEF and SEF covering the chamber bases  
632 (adhered over the trephination with dental acrylic) allowed access to the right FEF and  
633 SEF. Animals were seated within a custom-made primate chair during experiments,  
634 allowing free head movements at the center of three mutually orthogonal magnetic  
635 fields<sup>66</sup>. The values recorded from the 2-D and 3-D eye and head coils allowed us to  
636 compute other variables such as eye orientation relative to the head, eye- and head-  
637 velocities, and accelerations<sup>66</sup>.

### 638 **Basic Behavioral Paradigm**

641 The visual stimuli were presented on a flat screen (placed 80 cm in front of the animal)  
642 using laser projections (**Fig. 1A**). The animals were trained on a standard memory-  
643 guided saccade task where they had to remember a target location relative to a visual

644 allocentric landmark (two intersecting lines). This led to a temporal delay between the  
645 presentation of the target and beginning of the eye movement. The experiment was  
646 conducted in dark to avoid any other allocentric cue. A single trial consisted of the  
647 animal fixating on a red dot (placed centrally) for 500 ms in the presence of the  
648 allocentric landmark. This was followed by a brief flash of the visual target (T, white dot)  
649 for 100 ms, and then a brief delay (300 ms), a grid-like mask (200 ms, this hides the  
650 past visual traces, and also the current and future landmark) and a second memory  
651 delay (200-600 ms, i.e., from the onset of the landmark until the go signal). As the red  
652 fixation dot extinguished, the animal was signaled to saccade head-unrestrained  
653 (indicated by the solid green arrow) toward the memorized location of the target either in  
654 the presence of a shifted landmark (90 % of trials) or in absence of it (10 %, no-  
655 shift/zero-shift condition, i.e., the landmark was present at the same location as before  
656 mask). These trials with zero-shift were used to compute data at the 'origin' of the  
657 coordinate system for the T-T' spatial model fits as described below. The saccade  
658 targets were flashed one-by-one randomly throughout the response field of a neuron.  
659 Note: magenta color highlights the items that were not presented on the screen (they  
660 are shown only for representational purposes).

661

662 The spatial details of the task are depicted in **Figure 1B** illustrating the gaze shift (blue  
663 curve) to an example target (T) in presence of a shifted landmark (L'). **Figure 1B1**  
664 shows possible original landmark locations (L, black cross) to an example target (black  
665 dot). The red dot corresponds to the eye fixation and the red circle represents the jitter  
666 in initial home fixations. The landmark vertex could initially appear at one of four



667 locations,  $11^\circ$  obliquely relative to the target. **Figure 1B2** illustrates possible landmark  
668 shifts (magenta crosses) to an example original landmark location. In this case the  
669 landmark shifted ( $8^\circ$ ) to the top left as depicted by the black arrow. Notably, *the timing*  
670 *and amplitude of this shift was fixed*. **Figure 1B3** shows an example gaze shift from  
671 initial eye fixation to final gaze endpoint (G). T' stands for the virtual target (fixed to the  
672 shifted landmark). Since these animals had been trained, tested behaviorally<sup>11</sup> and  
673 then retrained for this study over a period exceeding two years, it is reasonable to  
674 expect that they may have learned to anticipate the timing and the amount of influence  
675 of the landmark shift. However, we were careful not to bias this influence: animals were  
676 rewarded with a water-drop if gaze was placed (G) within  $8\text{-}12^\circ$  radius around the  
677 original target (i.e., they were rewarded if they looked at T, toward or away from T', or  
678 anywhere in between). Based on our previous behavioral result in these animals<sup>11</sup>, we  
679 expected this paradigm to cause gaze to shift partially toward the virtually shifted target  
680 in landmark coordinates (T').

681  
682 Note that this paradigm was optimized for our method for fitting spatial models to neural  
683 activity (see below), which is based on variable dissociations between measurable  
684 parameters such as target location and effectors (gaze, eye, head), and various  
685 egocentric / allocentric reference frames<sup>12,28</sup>. This was optimized by providing variable  
686 landmark locations and shift directions, and the use of a large reward window to allow  
687 these shifts (and other endogenous factors) to influence gaze errors relative to T. We  
688 also jittered the initial fixation locations within a  $7\text{-}12^\circ$  window to dissociate gaze-  
689 centered and space-centered frames of reference (note that no correlation was

690 observed between the initial gaze location and final gaze errors). Further dissociations  
691 between effectors and egocentric frames were provided by the animals themselves, i.e.,  
692 in the naturally variable contributions of the eye and head to initial gaze position and the  
693 amplitude/direction of gaze shifts. Details of such behavior have been described in  
694 detail in our previous papers<sup>12,28</sup>.

695

## 696 **Behavioral Recordings and Analysis**

697

698 During experiments, we recorded the movement of eye and head orientations (in space)  
699 with a sampling rate of 1000 Hz. For the analysis of eye movement, the saccade onset  
700 (eye movement in space) was marked at the point in time when the gaze velocity  
701 exceeded 50°/s and the gaze offset was marked as the point in time when the velocity  
702 declined below 30°/s. The head movement was marked from the saccade onset till the  
703 time point at which the head velocity declined below 15°/s.

704 When the landmark shifted (90% of trials), its influence on measured future gaze  
705 position ( $G_i$ ) was called projected gaze offset ( $TG'_i$ ), computed as follows:

$$TG'_i = TG_i LS_{||,i} \begin{pmatrix} 1 \\ 0 \end{pmatrix} + TG_i LS_{\perp,i} \begin{pmatrix} 0 \\ 1 \end{pmatrix}$$

706 where  $TG'_i$  is allocentric weight;  $LS_{||,i}$  is the landmark shift in trial  $i$ ,  $LS_{\perp,i}$  is the landmark  
707 shift rotated by 90° counterclockwise and  $TG_i$  is the gaze offset (difference between the  
708 actual target location and the final measured gaze position). This computation was done  
709 for each trial  $i$ , and then averaged to find the representative landmark influence on  
710 behavior in a large number of trials. A projected gaze offset  $TG'_i$  of  $\begin{pmatrix} 0 \\ 0 \end{pmatrix}$  signifies a gaze

711 shift that landed exactly on T. A projected gaze offset  $TG'_i$  of  $\begin{pmatrix} 1 \\ 0 \end{pmatrix}$  means that the gaze  
712 headed toward a virtual target position (T') that remained fixed to the shifted landmark  
713 position. A projected gaze offset  $TG'_i$  of  $\begin{pmatrix} 0 \\ 1 \end{pmatrix}$  means that the gaze headed towards a  
714 point rotated by 90° counterclockwise virtual target position (T').

715

## 716 **Simulation**

717

718 We were interested in how the behavior data can be explained. To this end, we  
719 designed a stochastic process serving as means to simulate the neuronal process  
720 leading up to the behavior (**Fig. 7**). The stochastic process starts with three base  
721 distributions. The three distributions represent the visual input in one of three codes,  
722 egocentric  $\mathcal{P}_{ego}$ (C2R1) and predictive codes  $\mathcal{P}_{pred}$  (C1R2) and allocentric influence  
723  $\mathcal{P}_{allo}$  (C4R3).

$$\mathcal{P}_{ego} = \mathcal{N}_2(0, \sigma_{ego})$$

$$\mathcal{P}_{pred}^{\rho} = \mathcal{N}_1(\mu_{pred}, \sigma_{pred})$$

$$\mathcal{P}_{pred}^{\varphi} = \mathcal{U}$$

$$\mathcal{P}_{allo} = \mathcal{N}_2(LS, \sigma_{allo})$$

724

725 These distributions are then sampled resulting in three “guesses”:

$$ego_i \sim \mathcal{P}_{ego}$$

$$pred_i \sim \mathcal{P}_{pred}$$

$$allo_i \sim \mathcal{P}_{allo}$$

726 Then the weighted average of these guesses is calculated resulting in the intermediate  
727 distribution  $\mathcal{P}_{ego,pred}$  (C3R2),  $\mathcal{P}_{ego,allo}$  (C5R3) and  $\mathcal{P}_{ego,pred,allo}$  (C6R3).

$$\mathcal{P}_{ego,pred} = \frac{a ego_i + b pred_i}{a + b}$$

$$\mathcal{P}_{ego,allo} = \frac{c ego_i + d allo_i}{c + d}$$

$$\mathcal{P}_{ego,pred,allo} = \frac{\alpha ego_i + \beta pred_i + \gamma allo_i}{\alpha + \beta + \gamma}$$

728

729 Finally the combined distribution is reweighted by a faded ego centric target memory  
730  $\mathcal{W}_{ego}$  (C6R1) resulting in the final distribution  $\mathcal{P}$  (C7R2).

$$\mathcal{P} = \mathcal{W}_{ego} \mathcal{P}_{ego,pred,allo}$$

731 To produce one simulated saccade this distribution  $\mathcal{P}$  is sampled. This sampling was  
732 repeated 10000 times. The results of this process are displayed in **Figure 2**.

733

### 734 **Cluster analysis**

735

736 To visualize the dynamics of coding of single units, we aimed to reduce the time course  
737 to a small number of archetypical time courses. This dimensionality reduction was  
738 achieved by hierarchical clustering. For the clustering, we considered the coding and  
739 tuning time courses of the individual neurons. We employed the ward method<sup>68</sup> in  
740 conjunction with the Euclidian metric. The clustering resulted in three distinct clusters

741 representing archetypical single neuron time courses. The average time courses for  
742 each of these three clusters are shown in **Figure 6B**.

743

## 744 **Electrophysiological Recordings and Response Field Mapping**

745

746

747 We lowered tungsten electrodes (0.2–2.0 M $\Omega$  impedance, FHC Inc.) into the FEF and  
748 SEF [using separate Narishige (MO-90) hydraulic micromanipulators for each area] to  
749 record the neuronal activity. We then digitized, amplified, filtered, and saved the  
750 recorded activity for offline spike sorting. Sorting was performed using template  
751 matching and the principal component analysis on the isolated clusters (done with  
752 Plexon MAP System). The recorded sites (in head-restrained conditions) were further  
753 confirmed by low-threshold electrical microstimulation (50  $\mu$ A)<sup>69</sup>. The recorded sites  
754 from both animals are shown in **Figure 3A** (Monkey L in Blue and Monkey V in red).

755

756 Neurons were mainly searched while the monkey freely (head-unrestrained) scanned  
757 the environment. Once reliable neuronal spiking was noticed, the experiment started.  
758 The response field of a neuron was mapped while the animal performed the memory-  
759 guided saccade. After determining the horizontal and vertical extent of the response  
760 field, we presented the targets (one per trial) in a 4 x 4 to 7 x 7 array (5 –10° from each  
761 other) ranging 30-80°. This allowed characterization of visual and motor response fields.  
762 We aimed at collecting approximately 10 trials for each target. Thus, for bigger  
763 response fields (hence more targets), a greater number of recorded trials were needed  
764 and vice versa. On average  $343 \pm 166$  (mean  $\pm$  SD) and  $331 \pm 156$  trials/neuron were  
765 recorded in SEF and FEF respectively, again depending on the size of the response

766 field. We did such recordings from > 200 SEF and FEF sites, often in conjunction with  
767 each other.

768

### 769 **Data Inclusion Criteria, sampling window and neuronal classification**

770

771

772 In total, we isolated 256 SEF and 312 FEF neurons. Of these, we only analyzed task-  
773 modulated neurons with clear visual burst and/or with perisaccadic movement  
774 response. Neurons that only had post-saccadic activity (activity after the saccade onset)  
775 were excluded. Moreover, neurons that lacked significant spatial tuning were also  
776 eliminated (see 'Testing for Spatial Tuning' below). In the end, after applying our  
777 exclusion criteria, we were left with 68 SEF and 147 FEF spatially tuned neurons. We  
778 only included those trials where monkeys landed their gaze within the acceptance  
779 window for reward, however, from our analysis we removed gaze end points beyond  $\pm$   
780  $2^\circ$  of the mean distribution.

781

### 782 **Intermediate spatial models used in main analysis**

783

784 Our previous findings on FEF and SEF neurons have reported that response fields do  
785 not fit exactly against canonical models like Te or Ge, but actually may fit best against  
786 intermediate models between these canonical ones <sup>14</sup>. From our previous studies  
787 <sup>12,15,16</sup> we found that a Te-Ge (T-G, target-to-gaze) continuum (specifically, steps along  
788 the 'error line' between Te to Ge) best quantified the egocentric visuomotor  
789 transformation in the FEF and SEF (**Fig. 3C1**), thus, in current analysis we particularly  
790 focused on this continuum. Essentially, the continuum represents a concept that is

791 similar to an intermediate reference frame (e.g., between the eye and head) but here it  
792 is intermediate between the target and the final gaze position within the same frame of  
793 reference.

794

### 795 **Fitting Neural Response Fields against Spatial Models**

796

797

798 To differentiate/test between different spatial models, conceptually, they should be  
799 spatially separable <sup>12,28</sup>. The variation in natural behavior of monkeys allowed this  
800 spatial separation (see Results for details). For example, the variability produced by  
801 memory-guided gaze shifts allowed us to dissociate target coding from the gaze coding;  
802 the initial location of eye and head permitted us to differentiate between different  
803 egocentric reference frames and variability of eye and head movements for a gaze shift  
804 allowed us to distinguish different effectors. Notably, as in decoding methods that  
805 mostly test if a spatial property is implicitly coded in patterns of neuronal population  
806 activity <sup>70,71</sup>, our method directly tests which model best predicts the activity in the  
807 spatially neurons. The logic of our response field fitting method is shown in **Fig. 3C2**.  
808 Specifically, if the response field activity is plotted in the correct best/reference frame,  
809 this will lead to the lowest residuals (errors between the fit and data points) in  
810 comparison with other models, i.e., if a fit calculate to its response field matches the  
811 data, then this will lead to low residuals (**Fig. 3C2**, left). Conversely, if the fit does not  
812 describe the data well, this will yield higher residuals (**Fig. 3C2**, right). For instance, an  
813 eye-fixed response field calculated in eye-coordinates will lead to lower residuals and if  
814 it is computed in any other inferior/incorrect coordinate, this will yield higher residuals  
815 <sup>12,16</sup>.

816 In reality, a non-parametric fitting method was employed to characterize the neural  
817 activity with reference to a spatial location and we also varied the kernel bandwidth of  
818 the fit to plot response field of any size, shape, or contour<sup>28</sup>. The Predicted Residual  
819 Error Some of Squares (PRESS) statistics was used to test between various spatial  
820 models. To independently calculate the residual for a single trial, the actual activity  
821 associated with it was subtracted from the corresponding point on the fit calculated over  
822 all the other trials (similar to cross-validation). Importantly, if the physical shift (spatial)  
823 between two models leads to a systematic shift (direction and amount), this will be  
824 visible as a shifted or expanded response field and our model fitting method would fail  
825 to distinguish these two models as they would virtually yield indistinguishable/similar  
826 residuals. Because in our investigation, the distribution of relative positions in different  
827 models also includes a non-systematic variable component (e.g., variability in gaze  
828 endpoint errors, or pseudo-random landmark shifts), the response fields invariably were  
829 fixed at the same location, but the separation between different spatial models was  
830 based on the residual analysis.

831 Because the size and shape of response fields were not known beforehand and since  
832 the spatial distribution of datapoints was different for every spatial model (e.g., the  
833 models would have a higher range for eye than the head models), we calculated the  
834 non-parametric fits with different kernel bandwidths for each neuron (2-25°) thus  
835 ensuring that we did not bias the spatial fits toward a particular size and spatial  
836 distribution.

837

838 **Testing for Spatial Tuning**



839

840 The model fitting method assumes that neuronal activity is structured as spatially tuned  
841 response fields, but this does suggest that other neurons do not participate in the  
842 overall population code<sup>72-76</sup> but with our analytical tool-box only tuned neurons can be  
843 explicitly tested. The neuronal spatial tuning was tested as follows. The firing rate data  
844 points were randomly (100 times to obtain random 100 response fields) shuffled across  
845 the position data that we got from the best model. We then statistically compared the  
846 mean PRESS residual distribution ( $PRESS_{\text{random}}$ ) of the 100 randomly generated  
847 response fields with the mean PRESS residual ( $PRESS_{\text{best-fit}}$ ) distribution of the best-fit  
848 model (unshuffled, original data). If the best-fit mean PRESS was outside the 95%  
849 confidence interval of the distribution of the shuffled mean PRESS, we then deemed the  
850 neuron's activity as selective. At the spatiotemporal level, some neurons were spatially  
851 tuned at certain time-steps and others were untuned because of low signal/noise ratio.  
852 We thus removed the time steps where the populational mean spatial coherence  
853 (goodness of fit) was statistically indistinguishable from the baseline (before target  
854 onset) since there was no task-related information at this time and thus neural activity  
855 had no spatial tuning. We defined an index (Coherence Index, CI) for spatial tuning of a  
856 single neuron which was calculated as<sup>12</sup>:

857

858 Coherence Index =  $1 - (PRESS_{\text{best-fit}}/PRESS_{\text{random}})$

859

860 If the  $PRESS_{\text{best-fit}}$  was similar to  $PRESS_{\text{random}}$  then the CI would be roughly 0, whereas  
861 if the best-fit model is a perfect fit (i.e.,  $PRESS_{\text{best-fit}} = 0$ ), then the CI would be 1. We  
862 only included those neurons in our analysis that showed significant spatial tuning.

863

## 864 **Spatiotemporal analysis**

865

866 A major goal of this study was to track the progression of the T-G code in spatially tuned  
867 neuron populations, from the visual response onset until the mask offset / landmark  
868 shift. To finely track the evolution of the spatiotemporal code, we smoothed and binned  
869 the activity from visual response onset until the landmark shift into 7 half-overlapping  
870 bins. To this aim, the neural firing rate (in spikes/second; the number of spikes divided  
871 by the sampling interval for each trial) was sampled into 7 half-overlapping time  
872 windows (with a width of 120 ms). The bin number was chosen in such a way so that  
873 the sampling time window was wide enough, and thus robust enough to account for the  
874 stochastic nature of neuronal spiking activity (ensuring that there were enough neuronal  
875 spikes in the sampling window for effective spatial analysis)<sup>13,16</sup>. Once we estimated the  
876 firing rate for each trial at a given time-step, they were pooled together for spatial  
877 modeling. This procedure allowed us to treat the whole sequence of visual-memory  
878 responses from the visual response onset until the onset of landmark shift as a  
879 continuum.

880

## 881 **REFERENCES:**

882 1. Keller, G. B. & Mrsic-Flogel, T. D. *Predictive Processing: A Canonical Cortical*  
883 *Computation*. *Neuron* vol. 100 (Cell Press, 2018).

- 884 2. Teufel, C. & Fletcher, P. C. Forms of prediction in the nervous system. *Nature*  
885 *Reviews Neuroscience* **21**, 231–242 (2020).
- 886 3. Goodale, M. A. & Haffenden, A. Frames of reference for perception and action in  
887 the human visual system. *Neuroscience and biobehavioral reviews* **22**, 161–72 (1998).
- 888 4. Neggers, S. F. W., Schölvink, M. L. & van der Lubbe, R. H. J. Quantifying the  
889 interactions between allo- and egocentric representations of space. *Acta Psychologica*  
890 **118**, 25–45 (2005).
- 891 5. Neely, K. A., Tessmer, A., Binsted, G. & Heath, M. Goal-directed reaching:  
892 movement strategies influence the weighting of allocentric and egocentric visual cues.  
893 *Experimental Brain Research* **186**, 375–384 (2008).
- 894 6. Byrne, P. A. & Crawford, J. D. Cue Reliability and a Landmark Stability Heuristic  
895 Determine Relative Weighting Between Egocentric and Allocentric Visual Information in  
896 Memory-Guided Reach. *Journal of Neurophysiology* **103**, 3054–3069 (2010).
- 897 7. Chakrabarty, M., Nakano, T. & Kitazawa, S. Short-latency allocentric control of  
898 saccadic eye movements. *Journal of Neurophysiology* **117**, 376–387 (2017).
- 899 8. Aagten-Murphy, D. & Bays, P. M. Independent working memory resources for  
900 egocentric and allocentric spatial information. *PLOS Computational Biology* **15**,  
901 e1006563 (2019).
- 902 9. Karimpur, H., Kurz, J. & Fiehler, K. The role of perception and action on the use  
903 of allocentric information in a large-scale virtual environment. *Experimental Brain*  
904 *Research* 1–14 (2020) doi:10.1007/s00221-020-05839-2.
- 905 10. Fiehler, K., Wolf, C., Klinghammer, M. & Blohm, G. Integration of egocentric and  
906 allocentric information during memory-guided reaching to images of a natural  
907 environment. *Frontiers in Human Neuroscience* **8**, 636 (2014).
- 908 11. Li, J. *et al.* Effect of allocentric landmarks on primate gaze behavior in a cue  
909 conflict task. *Journal of vision* **17**, 20 (2017).
- 910 12. Sajad, A. *et al.* Visual-Motor Transformations Within Frontal Eye Fields During  
911 Head-Unrestrained Gaze Shifts in the Monkey. *Cerebral cortex (New York, N.Y. □:*  
912 *1991)* **25**, 3932–52 (2015).
- 913 13. Sajad, A., Sadeh, M., Yan, X., Wang, H. & Crawford, J. D. Transition from Target  
914 to Gaze Coding in Primate Frontal Eye Field during Memory Delay and Memory-Motor  
915 Transformation. *eNeuro* **3**, (2016).
- 916 14. Sajad, A., Sadeh, M. & Crawford, J. D. *Spatiotemporal transformations for gaze*  
917 *control. Physiological reports* vol. 8 (NLM (Medline), 2020).

- 918 15. Bharmauria, V. *et al.* Integration of eye-centered and landmark-centered codes in  
919 frontal eye field gaze responses. *Cerebral Cortex* **bhaa090**,  
920 <https://doi.org/10.1093/cercor/bhaa090> (2020).
- 921 16. Bharmauria, V., Sajad, A., Yan, X., Wang, H. & Crawford, J. D. Spatiotemporal  
922 Coding in the Macaque Supplementary Eye Fields: Landmark Influence in the Target-to-  
923 Gaze Transformation. *eNeuro* **8**, (2021).
- 924 17. So, N. & Stuphorn, V. Supplementary eye field encodes reward prediction error.  
925 *Journal of Neuroscience* **32**, 2950–2963 (2012).
- 926 18. Amador, N., Schlag-Rey, M. & Schlag, J. Reward-Predicting and Reward-  
927 Detecting Neuronal Activity in the Primate Supplementary Eye Field. *Journal of*  
928 *Neurophysiology* **84**, 2166–2170 (2000).
- 929 19. Schlag-Rey, M., Amador, N., Sanchez, H. & Schlag, J. Antisaccade performance  
930 predicted by neuronal activity in the supplementary eye field. *Nature* **390**, 398–401  
931 (1997).
- 932 20. Sadeh, M., Sajad, A., Wang, H., Yan, X. & Crawford, J. D. Spatial  
933 transformations between superior colliculus visual and motor response fields during  
934 head-unrestrained gaze shifts. *European Journal of Neuroscience* **42**, 2934–2951  
935 (2015).
- 936 21. So, N. & Stuphorn, V. Supplementary eye field encodes reward prediction error.  
937 *Journal of Neuroscience* **32**, 2950–2963 (2012).
- 938 22. Stuphorn, V., Brown, J. W. & Schall, J. D. Role of supplementary eye field in  
939 saccade initiation: Executive, not direct, control. *Journal of Neurophysiology* **103**, 801–  
940 816 (2010).
- 941 23. Kawaguchi, N. *et al.* Surprise signals in the supplementary eye field: rectified  
942 prediction errors drive exploration-exploitation transitions. *Journal of Neurophysiology*  
943 **113**, 1001–1014 (2014).
- 944 24. Abzug, Z. M. & Sommer, M. A. Supplementary Eye Fields. in *Reference Module*  
945 *in Neuroscience and Biobehavioral Psychology* (Elsevier, 2017). doi:10.1016/b978-0-  
946 12-809324-5.02941-2.
- 947 25. Purcell, B. A., Weigand, P. K. & Schall, J. D. Supplementary eye field during  
948 visual search: Saliency, cognitive control, and performance monitoring. *Journal of*  
949 *Neuroscience* **32**, 10273–10285 (2012).
- 950 26. Schall, J. D. Neuronal activity related to visually guided saccades in the frontal  
951 eye fields of rhesus monkeys: Comparison with supplementary eye fields. *Journal of*  
952 *Neurophysiology* **66**, 559–579 (1991).

- 953 27. Sadeh, M., Sajad, A., Wang, H., Yan, X. & Crawford, J. D. The Influence of a  
954 Memory Delay on Spatial Coding in the Superior Colliculus: Is Visual Always Visual and  
955 Motor Always Motor? *Frontiers in Neural Circuits* **12**, 74 (2018).
- 956 28. Keith, G. P., DeSouza, J. F. X., Yan, X., Wang, H. & Crawford, J. D. A method for  
957 mapping response fields and determining intrinsic reference frames of single-unit  
958 activity: Applied to 3D head-unrestrained gaze shifts. *Journal of Neuroscience Methods*  
959 **180**, 171–184 (2009).
- 960 29. Blohm, G., Keith, G. P. & Crawford, J. D. Decoding the cortical transformations  
961 for visually guided reaching in 3D space. *Cereb Cortex* **19**, 1372–1393 (2009).
- 962 30. J, L. & Jm, G. Auditory signals evolve from hybrid- to eye-centered coordinates in  
963 the primate superior colliculus. *J Neurophysiol* **108**, 227–242 (2012).
- 964 31. Nan, W., Sun, Y., Liu, X. & Wang, H. How Different Frames of Reference  
965 Interact: A Neural Network Model. *CogSci* (2016).
- 966 32. Schütz, A. *et al.* *Landmark-Centered Coding in Frontal Cortex Visual Responses*.  
967 <https://papers.ssrn.com/abstract=3733983> (2020) doi:10.2139/ssrn.3733983.
- 968 33. Chen, Y. & Crawford, J. D. Cortical Activation during Landmark-Centered vs.  
969 Gaze-Centered Memory of Saccade Targets in the Human: An fMRI Study. *Front Syst*  
970 *Neurosci* **11**, (2017).
- 971 34. Brouwer, A. J. de, Medendorp, W. P. & Smeets, J. B. J. Contributions of gaze-  
972 centered and object-centered coding in a double-step saccade task. *Journal of Vision*  
973 **16**, 12–12 (2016).
- 974 35. Schütz, I., Henriques, D. Y. P. & Fiehler, K. Gaze-centered spatial updating in  
975 delayed reaching even in the presence of landmarks. *Vision Research* **87**, 46–52  
976 (2013).
- 977 36. Fiehler, K., Brenner, E. & Spring, M. Prediction in goal-directed action. *Journal*  
978 *of Vision* **19**, 10–10 (2019).
- 979 37. Henderson, J. M. Gaze Control as Prediction. *Trends Cogn Sci* **21**, 15–23  
980 (2017).
- 981 38. Zinchenko, A., Conci, M., Müller, H. J. & Geyer, T. Predictive visual search: Role  
982 of environmental regularities in the learning of context cues. *Atten Percept Psychophys*  
983 **80**, 1096–1109 (2018).
- 984 39. Sjolund, L. A., Kelly, J. W. & McNamara, T. P. Optimal combination of  
985 environmental cues and path integration during navigation. *Mem Cognit* **46**, 89–99  
986 (2018).
- 987 40. Diaz, G., Cooper, J. & Hayhoe, M. Memory and prediction in natural gaze control.  
988 *Philos Trans R Soc Lond B Biol Sci* **368**, (2013).

- 989 41. Perrett, D. I., Xiao, D., Barraclough, N. E., Keyzers, C. & Oram, M. W. Seeing the  
990 future: Natural image sequences produce anticipatory neuronal activity and bias  
991 perceptual report. *Quarterly Journal of Experimental Psychology* **62**, 2081–2104 (2009).
- 992 42. Hollingworth, A. Guidance of Visual Search by Memory and Knowledge. *Nebr*  
993 *Symp Motiv* **59**, 63–89 (2012).
- 994 43. Verschure, P. F. M. J., Pennartz, C. M. A. & Pezzulo, G. The why, what, where,  
995 when and how of goal-directed choice: neuronal and computational principles. *Philos*  
996 *Trans R Soc Lond B Biol Sci* **369**, (2014).
- 997 44. Buschman, T. J. & Miller, E. K. Goal-direction and top-down control. *Philos Trans*  
998 *R Soc Lond B Biol Sci* **369**, (2014).
- 999 45. Danion, F. R. & Flanagan, J. R. Different gaze strategies during eye versus hand  
1000 tracking of a moving target. *Sci Rep* **8**, 10059 (2018).
- 1001 46. Smeets, J. B. J. & Brenner, E. Prediction of a moving target's position in fast  
1002 goal-directed action. *Biol. Cybern.* **73**, 519–528 (1995).
- 1003 47. Mochol, G., Kiani, R. & Moreno-Bote, R. Prefrontal cortex represents heuristics  
1004 that shape choice bias and its integration into future behavior. *Current Biology* **31**, 1234-  
1005 1244.e6 (2021).
- 1006 48. Welke, K., Asfour, T. & Dillmann, R. Bayesian visual feature integration with  
1007 saccadic eye movements. in *2009 9th IEEE-RAS International Conference on*  
1008 *Humanoid Robots* 256–262 (2009). doi:10.1109/ICHR.2009.5379570.
- 1009 49. Aagten-Murphy, D. & Bays, P. M. Functions of Memory Across Saccadic Eye  
1010 Movements. *Curr Top Behav Neurosci* **41**, 155–183 (2019).
- 1011 50. Klinghammer, M., Blohm, G. & Fiehler, K. Scene Configuration and Object  
1012 Reliability Affect the Use of Allocentric Information for Memory-Guided Reaching.  
1013 *Frontiers in Neuroscience* **11**, 204 (2017).
- 1014 51. Lemay, M., Bertram, C. P. & Stelmach, G. E. Pointing to an Allocentric and  
1015 Egocentric Remembered Target in Younger and Older Adults. *Experimental Aging*  
1016 *Research* **30**, 391–406 (2004).
- 1017 52. Zelinsky, G. J. A Theory of Eye Movements during Target Acquisition. *Psychol*  
1018 *Rev* **115**, 787–835 (2008).
- 1019 53. Stachenfeld, K. L., Botvinick, M. M. & Gershman, S. J. The hippocampus as a  
1020 predictive map. *Nat Neurosci* **20**, 1643–1653 (2017).
- 1021 54. Behrens, T. E. J. *et al.* What Is a Cognitive Map? Organizing Knowledge for  
1022 Flexible Behavior. *Neuron* **100**, 490–509 (2018).



- 1023 55. Khodadadi, A., Fakhari, P. & Busemeyer, J. R. Learning to maximize reward rate:  
1024 a model based on semi-Markov decision processes. *Front. Neurosci.* **8**, (2014).
- 1025 56. Körding, K. P. & Wolpert, D. M. Bayesian integration in sensorimotor learning.  
1026 *Nature* **427**, 244–247 (2004).
- 1027 57. Lehnert, L., Littman, M. L. & Frank, M. J. Reward-predictive representations  
1028 generalize across tasks in reinforcement learning. *PLOS Computational Biology* **16**,  
1029 e1008317 (2020).
- 1030 58. Schultz, W. Neuronal Reward and Decision Signals: From Theories to Data.  
1031 *Physiol Rev* **95**, 853–951 (2015).
- 1032 59. Tremblay, L., Gettner, S. N. & Olson, C. R. Neurons With Object-Centered  
1033 Spatial Selectivity in Macaque SEF: Do They Represent Locations or Rules? *Journal of*  
1034 *Neurophysiology* **87**, 333–350 (2002).
- 1035 60. Olson, C. R. & Gettner, S. N. Object-centered direction selectivity in the macaque  
1036 supplementary eye field. *Science (New York, N. Y.)* **269**, 985–8 (1995).
- 1037 61. Takeuchi, T., Duzskiewicz, A. J. & Morris, R. G. M. The synaptic plasticity and  
1038 memory hypothesis: encoding, storage and persistence. *Philos Trans R Soc Lond B*  
1039 *Biol Sci* **369**, (2014).
- 1040 62. Christophel, T. B., Klink, P. C., Spitzer, B., Roelfsema, P. R. & Haynes, J.-D. The  
1041 Distributed Nature of Working Memory. *Trends in Cognitive Sciences* **21**, 111–124  
1042 (2017).
- 1043 63. Chatham, C. H. & Badre, D. Multiple gates on working memory. *Current Opinion*  
1044 *in Behavioral Sciences* **1**, 23–31 (2015).
- 1045 64. Pinotsis, D. A., Buschman, T. J. & Miller, E. K. Working Memory Load Modulates  
1046 Neuronal Coupling. *Cerebral Cortex* **29**, 1670–1681 (2019).
- 1047 65. Bubic, A., Von Cramon, D. Y. & Schubotz, R. I. Prediction, cognition and the  
1048 brain. *Front. Hum. Neurosci.* **4**, (2010).
- 1049 66. Crawford, J. D., Ceylan, M. Z., Klier, E. M. & Guitton, D. Three-Dimensional Eye-  
1050 Head Coordination During Gaze Saccades in the Primate. *Journal of Neurophysiology*  
1051 **81**, 1760–1782 (1999).
- 1052 67. Klier, E. M., Wang, H. & Crawford, J. D. Three-Dimensional Eye-Head  
1053 Coordination Is Implemented Downstream From the Superior Colliculus. *Journal of*  
1054 *Neurophysiology* **89**, 2839–2853 (2003).
- 1055 68. Everitt, B., Landau, S., Leese, M. & Stahl, D. *Cluster analysis*. (Wiley, 2011).
- 1056 69. Bruce, C. J. & Goldberg, M. E. Primate frontal eye fields. I. Single neurons  
1057 discharging before saccades. *Journal of Neurophysiology* **53**, 603–635 (1985).

- 1058 70. Brandman, D. M., Cash, S. S. & Hochberg, L. R. Review: Human intracortical  
1059 recording and neural decoding for brain computer interfaces. *IEEE transactions on*  
1060 *neural systems and rehabilitation engineering*: a publication of the *IEEE Engineering*  
1061 *in Medicine and Biology Society* **25**, 1687 (2017).
- 1062 71. Bremmer, F., Kaminiarz, A., Klingenhoefer, S. & Churan, J. Decoding Target  
1063 Distance and Saccade Amplitude from Population Activity in the Macaque Lateral  
1064 Intraparietal Area (LIP). *Frontiers in Integrative Neuroscience* **10**, 30 (2016).
- 1065 72. Bharmauria, V. *et al.* Network-selectivity and stimulus-discrimination in the  
1066 primary visual cortex: cell-assembly dynamics. *Eur J Neurosci* **43**, 204–219 (2016).
- 1067 73. Zylberberg, J. The role of untuned neurons in sensory information coding.  
1068 *bioRxiv* 134379 (2018) doi:10.1101/134379.
- 1069 74. Pruszyński, J. A. & Zylberberg, J. The language of the brain: real-world neural  
1070 population codes. *Current Opinion in Neurobiology* **58**, 30–36 (2019).
- 1071 75. Mullette-Gillman, O. A., Cohen, Y. E. & Groh, J. M. Eye-centered, head-centered,  
1072 and complex coding of visual and auditory targets in the intraparietal sulcus. *Journal of*  
1073 *Neurophysiology* **94**, 2331–2352 (2005).
- 1074 76. Goris, R. L. T., Movshon, J. A. & Simoncelli, E. P. Partitioning neuronal  
1075 variability. *Nature Neuroscience* **17**, 858–865 (2014).
- 1076
- 1077
- 1078



1079 **Supplementary Figures:**

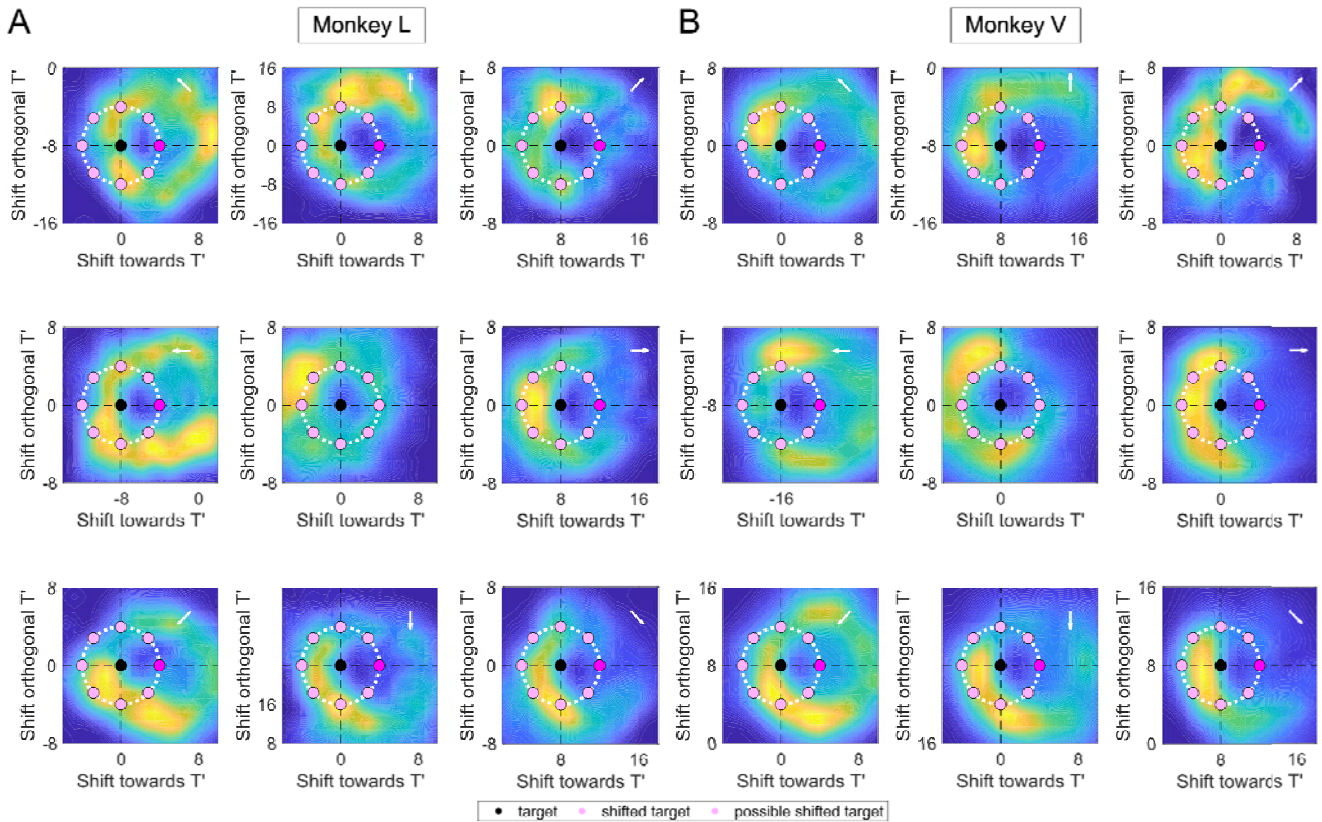

1080

1081 **Supplementary Figure 1:** The 'donut like' pattern was also observed when the  
1082 data were analyzed separately for each of the eight individual shift directions for both  
1083 animals (**A:** Monkey L; **B:** Monkey V). The white arrow indicates the direction of the  
1084 shift.

1085

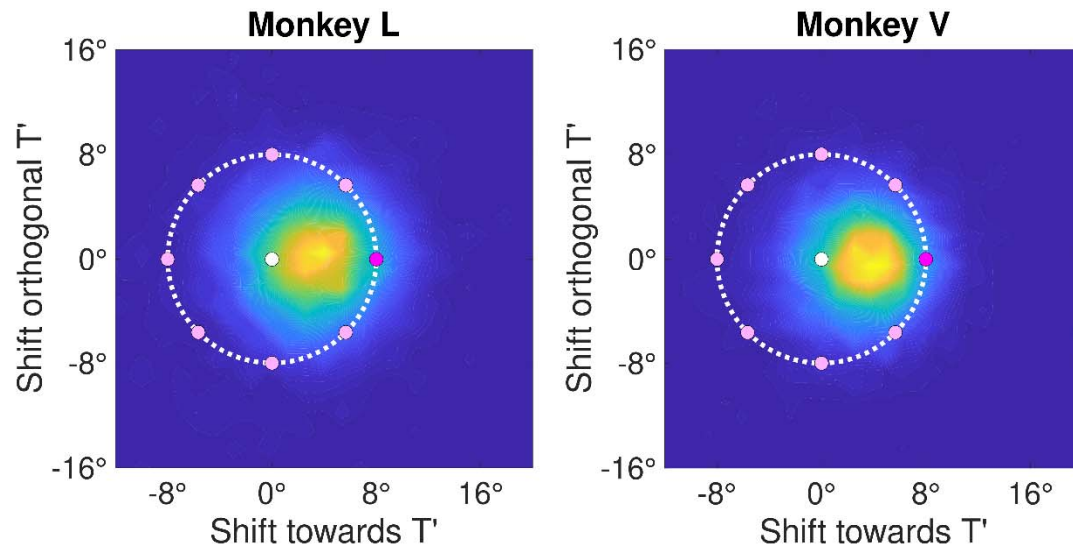

1086

1087 **Supplementary Figure 2:** Subtraction of the no-shift trials from the shift trials leads  
1088 to the collapse of torus into a gaussian distribution in both animals (Left: Monkey L,  
1089 Right: Monkey V).

1090
